# Supplementary material for: POP-Brazil study protocol: a nationwide cross-sectional evaluation of the prevalence and genotype distribution of human papillomavirus (HPV) in Brazil
Source: PubMed Central journal article supplement — BMJ Open. 2018 Jun 7;8(6):e021170. doi: 10.1136/bmjopen-2017-021170 (PMC6009568; doi:10.1136/bmjopen-2017-021170), 2018-06-07
Supplement: bmjopen-2017-021170.draft_revisions.pdf [file bmjopen-2017-021170.draft_revisions.pdf]

# BMJ Open

BMJ Open is committed to open peer review. As part of this commitment we make the peer review history of every article we publish publicly available.

When an article is published we post the peer reviewers' comments and the authors' responses online. We also post the versions of the paper that were used during peer review. These are the versions that the peer review comments apply to.

The versions of the paper that follow are the versions that were submitted during the peer review process. They are not the versions of record or the final published versions. They should not be cited or distributed as the published version of this manuscript.

BMJ Open is an open access journal and the full, final, typeset and author-corrected version of record of the manuscript is available on our site with no access controls, subscription charges or pay-per-view fees (<http://bmjopen.bmj.com>).

If you have any questions on BMJ Open's open peer review process please email [info.bmjopen@bmj.com](mailto:info.bmjopen@bmj.com)

# BMJ Open

## POP-Brazil Study Protocol: a nationwide cross-sectional evaluation of prevalence and genotype distribution of human papillomavirus (HPV) in Brazil

|                               |                                                                                                                                                                                                                                                                                                                                                                                                                                                                                                                                                                                                                                                                                                                                                                                                                                                                                                                                                                                                                                                                                                                                                                                                     |
|-------------------------------|-----------------------------------------------------------------------------------------------------------------------------------------------------------------------------------------------------------------------------------------------------------------------------------------------------------------------------------------------------------------------------------------------------------------------------------------------------------------------------------------------------------------------------------------------------------------------------------------------------------------------------------------------------------------------------------------------------------------------------------------------------------------------------------------------------------------------------------------------------------------------------------------------------------------------------------------------------------------------------------------------------------------------------------------------------------------------------------------------------------------------------------------------------------------------------------------------------|
| Journal:                      | <i>BMJ Open</i>                                                                                                                                                                                                                                                                                                                                                                                                                                                                                                                                                                                                                                                                                                                                                                                                                                                                                                                                                                                                                                                                                                                                                                                     |
| Manuscript ID                 | bmjopen-2017-021170                                                                                                                                                                                                                                                                                                                                                                                                                                                                                                                                                                                                                                                                                                                                                                                                                                                                                                                                                                                                                                                                                                                                                                                 |
| Article Type:                 | Protocol                                                                                                                                                                                                                                                                                                                                                                                                                                                                                                                                                                                                                                                                                                                                                                                                                                                                                                                                                                                                                                                                                                                                                                                            |
| Date Submitted by the Author: | 15-Dec-2017                                                                                                                                                                                                                                                                                                                                                                                                                                                                                                                                                                                                                                                                                                                                                                                                                                                                                                                                                                                                                                                                                                                                                                                         |
| Complete List of Authors:     | <p>WENDLAND, ELIANA; Hospital Moinhos de Vento; Federal University of Health Science of Porto Alegre<br/>           Caierao, Juliana; Moinhos de Vento Hospital<br/>           Domingues, Carla; Brazilian Ministry of Health, National Immunization Program<br/>           Maranhão, Ana ; Brazilian Ministry of Health, National Immunization Program<br/>           de Souza, Flávia; Brazilian Ministry of Health, Department of Surveillance, Prevention and Control of Sexually Transmitted Infections, HIV/AIDS and Viral Hepatitis<br/>           Hammes, Luciano; Hospital Moinhos de Vento<br/>           Falavigna, Maicon; Hospital Moinhos de Vento<br/>           Hilgert, Juliana; Universidade Federal do Rio Grande do Sul, Department of Preventive and Social Odontology<br/>           Hugo, Fernando; Federal University of Rio Grande do Sul, Department of Preventive and Social Odontology<br/>           Bessel, Marina; Hospital Moinhos de Vento<br/>           Villa, Luisa Lina; Universidade de Sao Paulo Faculdade de Medicina<br/>           Benzaken, Adele; Ministry of Health, Department of STDs/Aids and Viral Hepatitis. Health Surveillance Secretariat.</p> |
| Keywords:                     | HPV prevalence, nationwide study, HPV infection, cervical, penile                                                                                                                                                                                                                                                                                                                                                                                                                                                                                                                                                                                                                                                                                                                                                                                                                                                                                                                                                                                                                                                                                                                                   |
|                               |                                                                                                                                                                                                                                                                                                                                                                                                                                                                                                                                                                                                                                                                                                                                                                                                                                                                                                                                                                                                                                                                                                                                                                                                     |

SCHOLARONE™  
Manuscripts

1  
2  
3 **POP-Brazil Study Protocol: A nationwide cross-sectional evaluation of the prevalence and**  
4 **genotype distribution of human papillomavirus (HPV) in Brazil**  
5  
6  
7  
8  
9

10 Eliana Marcia Wendland<sup>1,2</sup>, Juliana Caierão<sup>1</sup>, Adele Schwartz Benzaken<sup>3</sup>, Carla Domingues<sup>4</sup>,  
11 Ana Goretti Kalume Maranhão<sup>4</sup>, Flavia Moreno Alves de Souza<sup>3</sup>, Luciano Serpa Hammes<sup>1</sup>,  
12 Maicon Falavigna<sup>1,5</sup>, Juliana Balbinot Hilgert<sup>6</sup>, Fernando Hugo<sup>6</sup>, Marina Bessel<sup>1</sup>, Luisa Lina  
13 Villa<sup>7</sup>  
14  
15  
16  
17  
18  
19  
20

21 <sup>1</sup>Hospital Moinhos de Vento. Porto Alegre, Brazil

22 <sup>2</sup>Federal University of Health Science of Porto Alegre. Community Health Department  
23 - Porto Alegre, Brazil  
24  
25  
26  
27

28 <sup>3</sup>Department of Surveillance, Prevention and Control of Sexually Transmitted Infections,  
29 HIV/AIDS and Viral Hepatitis, Brazilian Ministry of Health. Brasilia, Brasil  
30  
31  
32

33 <sup>4</sup>National Immunization Program, Brazilian Ministry of Health, Brazil. Brasília, Brasil  
34

35 <sup>5</sup>National Institute for Health Technology Assessment, Federal University of Rio Grande do Sul,  
36 Porto Alegre, Brazil  
37  
38  
39

40 <sup>6</sup>Department of Preventive and Social Odontology, Federal University of Rio Grande do Sul,  
41 Porto Alegre, Brazil  
42  
43

44 <sup>7</sup>University of São Paulo and Cancer Institute of the São Paulo State (ICESP) São Paulo, Brazil  
45  
46  
47  
48

49 **Corresponding author**

50  
51 Eliana Marcia Wendland

52  
53 Rua Ramiro Barcelos 910. 90035-000. Porto Alegre, Brazil  
54  
55  
56  
57  
58  
59  
60

1  
2  
3 E-mail: elianawend@gmail.com  
4

5 Tel.: +55 51 3314 3600  
6  
7  
8  
9

10 **Word count:** 2,712  
11  
12  
13  
14  
15  
16  
17  
18  
19  
20  
21  
22  
23  
24  
25  
26  
27  
28  
29  
30  
31  
32  
33  
34  
35  
36  
37  
38  
39  
40  
41  
42  
43  
44  
45  
46  
47  
48  
49  
50  
51  
52  
53  
54  
55  
56  
57  
58  
59  
60

For peer review only

## ABSTRACT

**Introduction:** Human papillomavirus (HPV) is associated with the development of genital warts and different types of cancer, including virtually all cervical cancers and a considerable number of penile, anal and oropharyngeal cancers. Data regarding the prevalence of HPV infection in Brazil are restricted and fragmented. We aim to determine the HPV prevalence in sexually active women and men from 16 to 25 years old and to investigate regional differences in virus prevalence and types. **Methods and analysis:** This is a nationwide, multi-centric, cross-sectional, prospective study that will include participants from 16 to 25 years old from all Brazilian capital cities. Recruitment will occur in primary health units by trained health professionals who will be responsible for collecting biological samples and interviewing the volunteers. After signing an informed consent form, all participants will answer a questionnaire that will gather sociodemographic and behavioral data. All samples will be processed in a certified central laboratory, and strict quality control will be performed by many different procedures, including double data entry, the training and certification of primary care health professionals responsible for data collection, the simulation of interviews and the auditing and monitoring of visits. The sample size will be standardized by the population distribution of each capital, using SAS<sup>®</sup> and R statistical software. **Ethics and dissemination:** The project was submitted to the Research Ethical Committee of the main institution and the corresponding ethical committees of the 27 recruiting sites. This will be the first Brazilian nationwide study to determine the overall HPV prevalence and to look at regional differences and social, demographic and behavioral factors related to HPV infection. Critical analysis of the study results will contribute to epidemiological knowledge and will set a baseline to evaluate the impact of the National HPV Vaccination Program in the future.

1  
2  
3  
4  
5 **Keywords:** HPV prevalence, nationwide study, HPV infection, cervical, penile  
6  
7  
8  
9

10 **Strengths and limitations of this study**  
11

- 12 • Representativeness of all regions of Brazil.
- 13  
14 • Establishment of a baseline to evaluate the effectiveness of the HPV vaccination program  
15 in Brazil.  
16  
17 • Recruitment done in primary care units, inviting all people within the age range living in  
18 the area and not over representing risk factor groups.  
19  
20 • Only the population that uses the primary care units from the public health system will be  
21 included, but that consists of 71% of the Brazilian population.  
22  
23  
24  
25  
26  
27  
28  
29  
30  
31  
32  
33  
34  
35  
36  
37  
38  
39  
40  
41  
42  
43  
44  
45  
46  
47  
48  
49  
50  
51  
52  
53  
54  
55  
56  
57  
58  
59  
60

## INTRODUCTION

According to the World Health Organization (WHO), more than 528,000 incident cases and approximately 270,000 deaths due to cervical cancer occur annually worldwide, 85% of which occur in low- and middle-income countries.[1] Virtually all these cancers are preceded by infection with high-risk oncogenic human papillomaviruses (HR-HPVs),[2] and HPV types 16 and 18 are associated with 70% of the cases.[3] In Brazil, the National Institute of Cancer estimated that there were 16,340 new cervical carcinoma cases in 2016, with a 33.23% mortality rate.[4]

HR-HPVs are also responsible for 63% of penile cancers, 89% of anal cancers and 72% of oropharyngeal cancers in men.[5, 6] Indeed, these viruses are now recognized as the major cause of the observed increasing incidence rates of oropharyngeal squamous cell carcinoma, and the primary risk factor for developing this cancer is oral HPV infection.[7]

Most sexually active individuals will be infected by HPV at some point in their lives.[8, 9] The prevalence of HPV infection in women with normal cervical cytology in Brazil varies from 2.3% to 55.4%.[10, 11] Other body sites, such as the penile epithelium and the oral cavity, also present considerable variability in HPV prevalence rates in Brazil.[10, 11]

These data came from heterogeneous studies regarding their methodology and/or the study population. In addition, virtually all studies are geographically restricted[12-16] and/or focused on specific groups of individuals, such as HIV-positive, pregnant and immunosuppressed patients.[17-19] Moreover, some of those studies recruit participants from clinics specializing in sexually transmitted infections, causing a selection bias and inflating the prevalence estimation.[12-19]

1  
2  
3 Vaccination against HPV is being performed in many countries, and it is a method of  
4 primary prevention of cancer and HPV infection.[8] Since 2014, the Brazilian Ministry of Health  
5 has provided a quadrivalent (types 6, 11, 16 and 18) vaccine for women from 9-14 years old,  
6 with a schedule of 0 and 6 months. In January 2017, Brazil was the first country in Latin  
7 America to extend vaccination to men (11-14 years old).[20] Baseline data of HPV prevalence  
8 before vaccinations are vital in order to establish the impact of vaccination on the distribution of  
9 HPV types.  
10  
11  
12  
13  
14  
15  
16  
17  
18

19 As far as we know, this is the first study presenting a nationwide scope with uniform  
20 methodology to evaluate the Brazilian prevalence of HPV and its types, as well as to compare  
21 the prevalence among specific geographical regions that present marked differences in social,  
22 demographic, cultural and economic characteristics. In addition, the study will describe the  
23 social, demographic, economic and behavioral factors associated with HPV positivity.  
24  
25  
26  
27  
28  
29  
30  
31  
32

### 33 **OBJECTIVES**

34  
35 The primary objective of the study is to determine the prevalence of HPV in women and  
36 men aged 16-25 in Brazil, evaluating the most prevalent types and possible differences between  
37 regions and risk factors associated with positivity.  
38  
39  
40  
41  
42  
43  
44

#### 45 **Secondary objectives**

- 46 • To determine the prevalence of HPV, high-risk types, genital warts and the  
47 associated sexual behaviors;
- 48 • To evaluate the co-infection of HPV-HIV in the young population that uses the  
49 public health system;
- 50  
51  
52  
53  
54  
55  
56  
57  
58  
59  
60



- To investigate beliefs and knowledge about HPV infection and vaccination in a young population;
- To evaluate the association of other sexually transmitted infections (STI), such as syphilis, with the presence of HPV;
- To establish an HPV prevalence baseline to evaluate vaccine effectiveness.

## **METHODS AND ANALYSIS**

### **Design**

We will use a cross-sectional, nationwide, multi-centric design to establish a baseline dataset that will enable prevalence comparison over time.

### **Recruitment and sample size**

Sexually active women and men from 16 to 25 years old who use the public health system in all 26 Brazilian capitals plus the Federal District of Brasilia across the five geographical regions will be recruited through public primary care units.

The following exclusion criteria apply: pregnant women, those who delivered a baby in the last 3 months, those who have undergone a hysterectomy or trachelectomy and those who have ever had cervical intraepithelial neoplasia grade 2 or higher will be considered ineligible for the study.

There will be no exclusion based on HPV vaccination status, but we will investigate whether the participants have been vaccinated. Since the vaccination program was launched in

1  
2  
3 2014 for women who were 9-13 years old and our study population is among 16-25-year-olds,  
4  
5 we believe that most of the volunteers will be not have been vaccinated.  
6  
7

8 The units were selected based on their representativeness of the health districts and based  
9  
10 on their resources to collect and store oral samples. Most of these units have a defined territory  
11  
12 and a list of all people within the age range. When the list is available, all participants will be  
13  
14 invited. When the list is not available, participants will be recruited by different approaches: (i)  
15  
16 eligible individuals who came to the unit for any reason not associated with the main study's  
17  
18 outcome; (ii) personal invitation by the community health agents; and (iii) invitation by nurses in  
19  
20 the school-based health promotion program. The study sample size (7,935 individuals) was  
21  
22 calculated to detect differences of 5% in HPV prevalence between regions with a power of 80%  
23  
24 and an alpha error of 5% for women, using an estimate of 30%[21] for the prevalence of HPV in  
25  
26 Brazil. This sample size will allow an estimate with an error between 1.6% and 5.7%, according  
27  
28 to sex.  
29  
30  
31  
32

33 The sample size will be purposely equal in all regions (1,587 individuals) to maximize  
34  
35 the diversity in less populated areas and will be standardized by the Brazilian population of each  
36  
37 region during analyses.  
38  
39  
40  
41

## 42 **Measurements**

43  
44  
45  
46

### 47 Sociodemographic variables

48

49 Participants will be asked to answer questions regarding age, gender, race/skin color,  
50  
51 household characteristics, relationship status, educational level, occupational status, last-month  
52  
53 family income and the number of people dependent on this income.  
54  
55  
56  
57  
58  
59  
60

### Smoking, alcohol and other drugs

Questions concerning current and past smoking habits, including quantity and frequency, will be asked of the participants. Moreover, the interview includes questions about the use of alcohol and other drugs such as marijuana, cocaine, ecstasy, crack, and the abuse of morphine or other licit and illicit drugs.

### Sexual and reproductive health

Participants will be asked to supply details about their age at first sexual intercourse, their involvement in same sex relationships, their use of condoms, the number of sexual partners, their sexual practices and the presence of any genital symptoms during or after sexual intercourse such as pain or bleeding.

Their age of menarche, the number of pregnancies and deliveries, the number of abortions, their use of contraceptive methods and the occurrence of sexually transmitted infections will be asked of participants to evaluate their sexual health. All suspicious HPV-related lesions will be photographed for future evaluation.

### Knowledge about HPV and vaccination

We will measure how much participants know about HPV and vaccination (when and who must receive the vaccine). The questionnaire is based on Saulle et al.,[22] Moreover, participants will be asked if they know about Pap smears, if they have already received the exam and if so, if any alteration was ever observed.

## HPV frequency and type

We will measure the proportion of the sample that is infected by HPV, and we will look at the prevalence of high-risk types and the most prevalent types in the genital and oropharyngeal sites. Additionally, we will investigate the presence of chronic lesions (lasting 15 days or more) in the oral cavity that are related to the presence of HPV.

## Outcomes

The nationwide prevalence of HPV in the genitals is the major outcome. Secondary outcomes include the prevalence of specific HPV types, the comparison of prevalence between Brazilian regions, and the prevalence of HR-HPVs and LR-HPVs.

## Procedures

All individuals will respond to a standardized questionnaire based on validated instruments[22-25] and will undergo the collection of specimens from the oral cavity and the cervical or penile/scrotal sites. Oral samples will be obtained through mouthwash and gargle.

An online platform for data entry will be used by the study staff to include participant data, biological sample information and photographs. The same platform will be used for study process control and to make the results available to health professionals and participants.

Cervical samples will be obtained using the Digene® HC2 DNA Collection Device (Qiagen), and penis (penile shaft, glans penis/coronal sulcus) and scrotum samples will be obtained using a Dacron swab (Qiagen) previously humidified in sterile saline solution by intensely pressing and rubbing the swab in the epithelium.

1  
2  
3 Individuals who present visible lesions on the genitals or in the oral cavity at the time of  
4 recruitment will be asked to grant permission for a picture to be taken of the lesion.  
5  
6

7  
8 All biological samples will be maintained at room temperature (15°C to 25°C) according  
9  
10 to manufacturer's instructions and transported to a central lab in Porto Alegre to start the  
11 specimen processing. The temperature will be monitored with a data logger. Figure 1 presents  
12 the general logistics for the nationwide multicenter collection of data and specimens.  
13  
14  
15

### 16 17 18 19 Specimen processing 20

21 In the laboratory, specimens will be immediately aliquoted. One aliquot will be  
22 maintained at -80°C as a backup. Another aliquot will be processed for DNA extraction using the  
23 automatized extraction platform MagNA Pure<sup>®</sup> (Roche), following the manufacturer's  
24 instruction.  
25  
26  
27  
28  
29

30  
31 HPV detection and typing will be done using the Linear Array<sup>®</sup> HPV Genotyping Test  
32 (Roche Diagnostics), which is based on PCR amplification (450-bp fragment of the polymorphic  
33 region of the L1 gene of HPV), followed by specific hybridization and colorimetric detection.  
34  
35 The test detects HR-HPVs (16, 18, 31, 33, 35, 39, 45, 51, 52, 56, 58, 59 and 68) and LR-HPVs  
36 (6, 11, 26, 40, 42, 53, 54, 55, 61, 62, 64, 66, 67, 69, 70, 71, 72, 73, 81, 82, 83, 84, IS39 and  
37 CP6198), for a total of 37 types. The amplification of human  $\beta$ -globin (biotinylated  
38 primers GH20 and PC04, 268-bp fragment) is used as an internal control for the PCR. Whenever  
39 necessary, real-time PCR using the TaqMan system will be performed to confirm the HPV type.  
40  
41  
42  
43  
44  
45  
46  
47  
48  
49  
50  
51  
52  
53  
54  
55  
56  
57  
58  
59  
60  
61  
62  
63  
64  
65  
66  
67  
68  
69  
70  
71  
72  
73  
74  
75  
76  
77  
78  
79  
80  
81  
82  
83  
84  
85  
86  
87  
88  
89  
90  
91  
92  
93  
94  
95  
96  
97  
98  
99  
100  
101  
102  
103  
104  
105  
106  
107  
108  
109  
110  
111  
112  
113  
114  
115  
116  
117  
118  
119  
120  
121  
122  
123  
124  
125  
126  
127  
128  
129  
130  
131  
132  
133  
134  
135  
136  
137  
138  
139  
140  
141  
142  
143  
144  
145  
146  
147  
148  
149  
150  
151  
152  
153  
154  
155  
156  
157  
158  
159  
160  
161  
162  
163  
164  
165  
166  
167  
168  
169  
170  
171  
172  
173  
174  
175  
176  
177  
178  
179  
180  
181  
182  
183  
184  
185  
186  
187  
188  
189  
190  
191  
192  
193  
194  
195  
196  
197  
198  
199  
200  
201  
202  
203  
204  
205  
206  
207  
208  
209  
210  
211  
212  
213  
214  
215  
216  
217  
218  
219  
220  
221  
222  
223  
224  
225  
226  
227  
228  
229  
230  
231  
232  
233  
234  
235  
236  
237  
238  
239  
240  
241  
242  
243  
244  
245  
246  
247  
248  
249  
250  
251  
252  
253  
254  
255  
256  
257  
258  
259  
260  
261  
262  
263  
264  
265  
266  
267  
268  
269  
270  
271  
272  
273  
274  
275  
276  
277  
278  
279  
280  
281  
282  
283  
284  
285  
286  
287  
288  
289  
290  
291  
292  
293  
294  
295  
296  
297  
298  
299  
300  
301  
302  
303  
304  
305  
306  
307  
308  
309  
310  
311  
312  
313  
314  
315  
316  
317  
318  
319  
320  
321  
322  
323  
324  
325  
326  
327  
328  
329  
330  
331  
332  
333  
334  
335  
336  
337  
338  
339  
340  
341  
342  
343  
344  
345  
346  
347  
348  
349  
350  
351  
352  
353  
354  
355  
356  
357  
358  
359  
360  
361  
362  
363  
364  
365  
366  
367  
368  
369  
370  
371  
372  
373  
374  
375  
376  
377  
378  
379  
380  
381  
382  
383  
384  
385  
386  
387  
388  
389  
390  
391  
392  
393  
394  
395  
396  
397  
398  
399  
400  
401  
402  
403  
404  
405  
406  
407  
408  
409  
410  
411  
412  
413  
414  
415  
416  
417  
418  
419  
420  
421  
422  
423  
424  
425  
426  
427  
428  
429  
430  
431  
432  
433  
434  
435  
436  
437  
438  
439  
440  
441  
442  
443  
444  
445  
446  
447  
448  
449  
450  
451  
452  
453  
454  
455  
456  
457  
458  
459  
460  
461  
462  
463  
464  
465  
466  
467  
468  
469  
470  
471  
472  
473  
474  
475  
476  
477  
478  
479  
480  
481  
482  
483  
484  
485  
486  
487  
488  
489  
490  
491  
492  
493  
494  
495  
496  
497  
498  
499  
500  
501  
502  
503  
504  
505  
506  
507  
508  
509  
510  
511  
512  
513  
514  
515  
516  
517  
518  
519  
520  
521  
522  
523  
524  
525  
526  
527  
528  
529  
530  
531  
532  
533  
534  
535  
536  
537  
538  
539  
540  
541  
542  
543  
544  
545  
546  
547  
548  
549  
550  
551  
552  
553  
554  
555  
556  
557  
558  
559  
560  
561  
562  
563  
564  
565  
566  
567  
568  
569  
570  
571  
572  
573  
574  
575  
576  
577  
578  
579  
580  
581  
582  
583  
584  
585  
586  
587  
588  
589  
590  
591  
592  
593  
594  
595  
596  
597  
598  
599  
600  
601  
602  
603  
604  
605  
606  
607  
608  
609  
610  
611  
612  
613  
614  
615  
616  
617  
618  
619  
620  
621  
622  
623  
624  
625  
626  
627  
628  
629  
630  
631  
632  
633  
634  
635  
636  
637  
638  
639  
640  
641  
642  
643  
644  
645  
646  
647  
648  
649  
650  
651  
652  
653  
654  
655  
656  
657  
658  
659  
660  
661  
662  
663  
664  
665  
666  
667  
668  
669  
670  
671  
672  
673  
674  
675  
676  
677  
678  
679  
680  
681  
682  
683  
684  
685  
686  
687  
688  
689  
690  
691  
692  
693  
694  
695  
696  
697  
698  
699  
700  
701  
702  
703  
704  
705  
706  
707  
708  
709  
710  
711  
712  
713  
714  
715  
716  
717  
718  
719  
720  
721  
722  
723  
724  
725  
726  
727  
728  
729  
730  
731  
732  
733  
734  
735  
736  
737  
738  
739  
740  
741  
742  
743  
744  
745  
746  
747  
748  
749  
750  
751  
752  
753  
754  
755  
756  
757  
758  
759  
760  
761  
762  
763  
764  
765  
766  
767  
768  
769  
770  
771  
772  
773  
774  
775  
776  
777  
778  
779  
780  
781  
782  
783  
784  
785  
786  
787  
788  
789  
790  
791  
792  
793  
794  
795  
796  
797  
798  
799  
800  
801  
802  
803  
804  
805  
806  
807  
808  
809  
810  
811  
812  
813  
814  
815  
816  
817  
818  
819  
820  
821  
822  
823  
824  
825  
826  
827  
828  
829  
830  
831  
832  
833  
834  
835  
836  
837  
838  
839  
840  
841  
842  
843  
844  
845  
846  
847  
848  
849  
850  
851  
852  
853  
854  
855  
856  
857  
858  
859  
860  
861  
862  
863  
864  
865  
866  
867  
868  
869  
870  
871  
872  
873  
874  
875  
876  
877  
878  
879  
880  
881  
882  
883  
884  
885  
886  
887  
888  
889  
890  
891  
892  
893  
894  
895  
896  
897  
898  
899  
900  
901  
902  
903  
904  
905  
906  
907  
908  
909  
910  
911  
912  
913  
914  
915  
916  
917  
918  
919  
920  
921  
922  
923  
924  
925  
926  
927  
928  
929  
930  
931  
932  
933  
934  
935  
936  
937  
938  
939  
940  
941  
942  
943  
944  
945  
946  
947  
948  
949  
950  
951  
952  
953  
954  
955  
956  
957  
958  
959  
960  
961  
962  
963  
964  
965  
966  
967  
968  
969  
970  
971  
972  
973  
974  
975  
976  
977  
978  
979  
980  
981  
982  
983  
984  
985  
986  
987  
988  
989  
990  
991  
992  
993  
994  
995  
996  
997  
998  
999  
1000

### **Data analyses and statistics**

Categorical variables will be summarized using absolute frequencies and percentage, while continuous variables will be analyzed using means and standard error. Chi-squared tests and Fisher's exact tests will be used to compare proportions, and t-tests or Mann-Whitney non-parametric tests will be used for continuous variables.

The association between HPV infection and social and behavioral variables will be defined by calculating crude and adjusted prevalence ratios. Confounding variables will be evaluated using a modified Poisson regression analysis.[26]

To maximize diversity across regions, we have divided the sample size into equal numbers among regions. To adjust the distribution of the sample to the study population, we will standardize the measures by the size of the population in each capital within the age range and by sex.

### **Monitoring and quality control**

The data quality will be validated by routine practices. A pilot study was performed to identify and correct problems in data collection, sample transportation, procedures and instruments. All health professionals involved in the research are trained and certified by the coordinator team using simulated interview and sample collection according to the study protocol, as described in the POP-Brazil operations manuals.

Data and specimen collection are periodically evaluated by reports generated by the data system, including information about the number of participants and the number of refusals, and the quality of the samples collected. Those reports will be distributed monthly to all people involved in data collection.

1  
2  
3 Moreover, each unit will receive at least one *in loco* monitoring visit, which will be done  
4 by research staff supervisors to evaluate protocol compliance and provide recertification.  
5  
6 Supervisors will observe techniques utilizing predefined check lists and recorded interviews.  
7  
8  
9

10 The biological sample tracking is done through the web-based data platform, and time,  
11 temperature and sample conditions are evaluated on a daily basis.  
12  
13

14 To access the reliability of the interviews, a subsample will be obtained in duplicate. A  
15 resampling will be done in 10% of the interviews using phone calls to access the coefficient of  
16 variation and systematic differences between data. Figure 2 presents the steps that will be taken  
17 for quality assurance. The reliability of HPV detection will be accessed by double processing a  
18 random subsample of the biological genital samples by the Centers for Disease Control and  
19 Prevention.  
20  
21  
22  
23  
24  
25  
26  
27  
28  
29  
30  
31  
32

## 33 **DISCUSSION**

34  
35 This is the first Brazilian nationwide study to determine HPV prevalence and the social,  
36 demographic and behavioral factors related to HPV infection. Critical analysis of the study  
37 results will contribute to epidemiological knowledge of the distribution of HPV strains across  
38 geographical regions and will establish a baseline to evaluate the impact of the Brazilian  
39 Vaccination Program.  
40  
41  
42  
43  
44  
45

46  
47 There are some limitations of this study. The sampling is not random. Brazil is a large  
48 country, and due to logistic reasons, the sampling is restricted to state capitals in public health  
49 units selected by the local government. To minimize selection bias, in addition to recruiting  
50 participants that voluntarily come to the health unit, we will also recruit at schools, through the  
51  
52  
53  
54  
55  
56  
57  
58  
59  
60

1  
2  
3 list of patients of the selected health units, and by personal invitation by community health  
4 agents in households. We are also only recruiting participants in the public health system, which  
5 account for approximately 70% of the population, and therefore, we cannot make inferences  
6 about people who exclusively use the private sector.  
7  
8  
9  
10

11  
12 The strengths of the study are the establishment of a baseline for future comparison of  
13 HPV prevalence, the nationwide sampling, including a large and diverse population and the use  
14 of central laboratory and techniques for data quality monitoring. Additionally, we will collect  
15 data on sexual behaviors and other STIs, making it possible to pursue some explanation  
16 regarding differences in prevalence according to specific groups of participants.  
17  
18  
19  
20  
21  
22

23  
24 Health managers, based on these data, will be able to compare HPV prevalence in  
25 different regions according to population characteristics; it will be possible to support the  
26 development of strategies to promote HPV vaccination and to develop strategies for prevention,  
27 taking into account regional differences. Moreover, these data will serve as a baseline for future  
28 comparisons and will allow monitoring of the effectiveness of the National HPV Vaccination  
29 Program.  
30  
31  
32  
33  
34  
35  
36  
37  
38  
39

#### 40 ETHICS AND DISSEMINATION

41  
42 Before starting the study, this project was submitted to the Research Ethical Committee  
43 of the proposing institution (Hospital Moinhos de Vento). Following approval, agreements were  
44 made by all co-participant centers and submitted to their corresponding ethical committees.  
45  
46  
47  
48

49 Individuals must voluntarily agree to participate and must sign the free and informed  
50 consent form. The study follows the ethical recommendations of Resolutions 347/05, 441/11 and  
51 466/12 of the National Health Council.  
52  
53  
54  
55  
56  
57  
58  
59  
60



1  
2  
3 Patients will be informed of negative results via web access, and patients with positive  
4  
5 results will be advised to go to the health care unit for their results, where they will be educated  
6  
7  
8 about healthy sexual habits and STI prevention.  
9  
10  
11  
12  
13  
14  
15  
16  
17  
18  
19  
20  
21  
22  
23  
24  
25  
26  
27  
28  
29  
30  
31  
32  
33  
34  
35  
36  
37  
38  
39  
40  
41  
42  
43  
44  
45  
46  
47  
48  
49  
50  
51  
52  
53  
54  
55  
56  
57  
58  
59  
60

## REFERENCES

1. Globocan. Home page. 2012. <http://globocan.iarc.fr/Default.aspx> (accessed 1 Dec 2017).
2. Walboomers JM, Jacobs MV, Manos MM, et al. Human papillomavirus is a necessary cause of invasive cervical cancer worldwide. *J Pathol* 1999;189:12–9.
3. Bosch FX, Lorincz A, Munoz N, et al. The causal relation between human papillomavirus and cervical cancer. *J Clin Pathol* 2002;55:244–65.
4. INCA. Portal–Instituto Nacional de Câncer. <http://www2.inca.gov.br/wps/wcm/connect/inca/portal/home> (accessed 1 Dec 2017).
5. Serrano B, Brotons M, Bosch FX, et al. Epidemiology and burden of HPV-related disease. *Best Pract Res Clin Obstet Gynaecol* 2017. doi:10.1016/j.bpobgyn.2017.08.006
6. Han JJ, Tarney CM, Song J. Variation in genital human papillomavirus infection prevalence and vaccination coverage among men and women in the USA. *Future Oncol* 2017;13:1129–32.
7. Taberna M, Mena M, Pavon MA, et al. Human papillomavirus-related oropharyngeal cancer. *Ann Oncol* 2017;28:2386–98.
8. CDC. HPV | Home | Human Papillomavirus. <https://www.cdc.gov/hpv/index.html> (accessed 1 Dec 2017).
9. Syrjanen K, Hakama M, Saarikoski S, et al. Prevalence, incidence, and estimated lifetime risk of cervical human papillomavirus infections in a nonselected Finnish female population. *Sex Transm Dis* 1990;17:15–9.
10. HPV. HPV information centre. <http://www.hpvcentre.net/> (accessed 1 Dec 2017).
11. Colpani V, Bidinotto AB, Falavigna M, et al. Prevalence of papillomavirus in Brazil: a systematic review protocol. *BMJ Open* 2016;6: e011884.

12. Coser J, Boeira TR, Wolf JM, et al. Cervical human papillomavirus infection and persistence: a clinic-based study in the countryside from South Brazil. *Braz J Infect Dis* 2016;20:61–8.
13. de Oliveira GR, Vieira VC, Barral MF, et al. Risk factors and prevalence of HPV infection in patients from basic health units of an university hospital in Southern Brazil. *Rev Bras Ginecol Obstet* 2013;35:226–32.
14. Correa CM, Teixeira NC, Araujo AC, et al. Prevalence and multiplicity of HPV in HIV women in Minas Gerais, Brazil. *Rev Assoc Med Bras* 2011;57:425–30.
15. da Silva MC, Martins HP, de Souza JL, et al. Prevalence of HPV infection and genotypes in women with normal cervical cytology in the state of Parana, Brazil. *Arch Gynecol Obstet* 2012;286:1015–22.
16. Girianelli VR, Thuler LC, e Silva GA. Prevalence of HPV infection among women covered by the family health program in the Baixada Fluminense, Rio de Janeiro, Brazil. *Rev Bras Ginecol Obstet* 2010;32:39–46.
17. Meyrelles AR, Siqueira JD, Hofer CB, et al. HIV/HPV co-infection during pregnancy in southeastern Brazil: prevalence, HPV types, cytological abnormalities and risk factors. *Gynecol Oncol* 2013;128:107–12.
18. Silva LM, Santos WG, Santiago MB. Prevalence of cutaneous warts in patients with systemic lupus erythematosus: a systematic review. *J Infect Dev Ctries* 2016;10:902–6.
19. Vieira RC, Monteiro JS, Manso EP, et al. Prevalence of type-specific HPV among female university students from northern Brazil. *Infect Agent Cancer* 2015;10:21.
20. UNA-SUS. HPV. <https://www.unasus.gov.br/tags/hpv> (accessed 1 Dec 2017).

- 1  
2  
3 21. Ayres AR, Silva GA. Cervical HPV infection in Brazil: systematic review. *Rev Saude*  
4 *Publica* 2010;44:963–74.  
5  
6  
7  
8 22. Saulle R, Miccoli S, Unim B, et al. Validation of a questionnaire for young women to  
9 assess knowledge, attitudes and behaviors towards cervical screening and vaccination  
10 against HPV in Italy. *Epidemiol Biostat Public Health* 2014;11:e8913.  
11  
12  
13  
14 23. ABEP. Critério Brasil. <http://www.abep.org/criterio-brasil> (accessed 1 Dec 2017).  
15  
16  
17 24. Soares AHR. O aprendizado da sexualidade: reprodução e trajetórias sociais de jovens  
18 Brasileiros. *Cad Saude Publica* 2007;23:1495–6.  
19  
20  
21 25. Biblioteca Virtual em Saúde. Comportamento sexual da população Brasileira e  
22 percepções do HIV/AIDS. <http://pesquisa.bvsalud.org/bvsms/resource/pt/mis-3389>  
23 (accessed 1 Dec 2017).  
24  
25  
26  
27  
28 26. Barros AJ, Hirakata VN. Alternatives for logistic regression in cross-sectional studies: an  
29 empirical comparison of models that directly estimate the prevalence ratio. *BMC Med*  
30 *Res Methodol* 2003;3:21.  
31  
32  
33  
34  
35  
36  
37  
38  
39  
40  
41  
42  
43  
44  
45  
46  
47  
48  
49  
50  
51  
52  
53  
54  
55  
56  
57  
58  
59  
60

## **AUTHOR'S CONTRIBUTION**

EMW conceived of the project and participated in all phases of the manuscript preparation; ASB, AGM, LSH, MFAS, JH, FM, LLV, CMD and MB participated in the protocol development; and JC and LLV participated in the laboratory protocol development and helped write the manuscript. All authors reviewed the final version of the manuscript.

## **FUNDING**

This work was supported by the Pan-American Health Organization and the Brazilian Ministry of Health along with the Moinhos de Vento Hospital through the Program for Supporting the Institutional Development of the Public Health System (PROADI-SUS).

## **COMPETING INTERESTS**

ASB, FMAS, CMD and AGM work for the Ministry of Health of Brazil. The other authors declare no conflict of interest. LLV is a consultant for Merck for the HPV quadrivalent vaccine and for Qiagen, BD and Roche for HPV DNA tests.

## **ACKNOWLEDGMENTS**

We would like to thank Julian Peto and Claire Gilham from the London School of Hygiene and Tropical Medicine for helping with the development of sampling procedures and Elisabeth Unger and Lauri Markowitz from the Centers for Disease Control and Prevention for providing helpful suggestions in developing the study protocol and quality control.

## Figure legends

**Figure 1.** Workflow of the study. 1. Data are collected in public health units from all 27 Brazilian capitals; 2. Data entry into the web-based system is performed by primary care professionals and is monitored by the main research team in Porto Alegre (Hospital Moinhos de Vento); 3. Paper forms are sent to Porto Alegre along with biological samples, which are processed for DNA extraction (UFCSPA); and 4. Extracted DNA is sent to São Paulo (USP) for HPV detection and typing. Finally, the results are included in the web-based system and are made available for the primary care professionals and participants.

**Figure 2.** Description of the study's major quality control steps during each phase of the study.

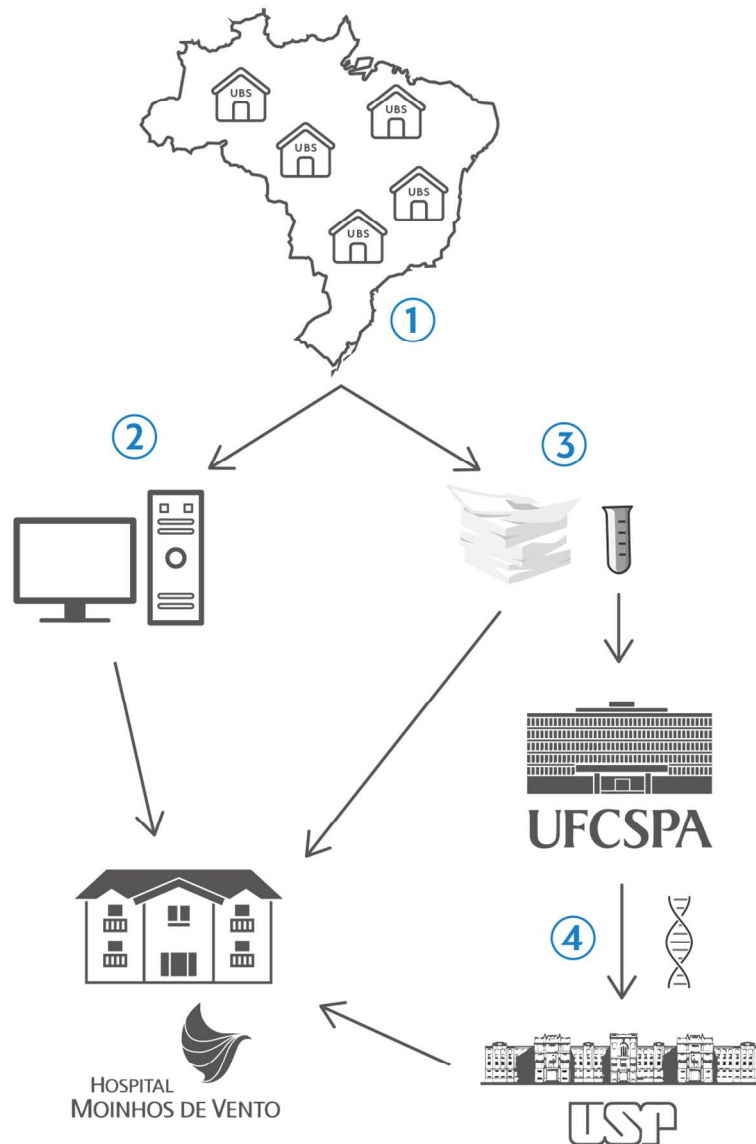

Workflow of the study. 1. Data are collected in Public Health Units from all 27 Brazilian capitals; 2. Data entry on the web-based system are performed by primary care professionals and are monitored by main research team in Porto Alegre (Hospital Moinhos de Vento); 3. Paper forms are sent to Porto Alegre along with biological samples, which are processed for DNA extraction (UFCSPA); 4. Extracted DNA are sent to São Paulo (USP) for HPV detection and typing. Finally, results are included on the web-based system and became available for primary care professionals and participants.

106x143mm (300 x 300 DPI)

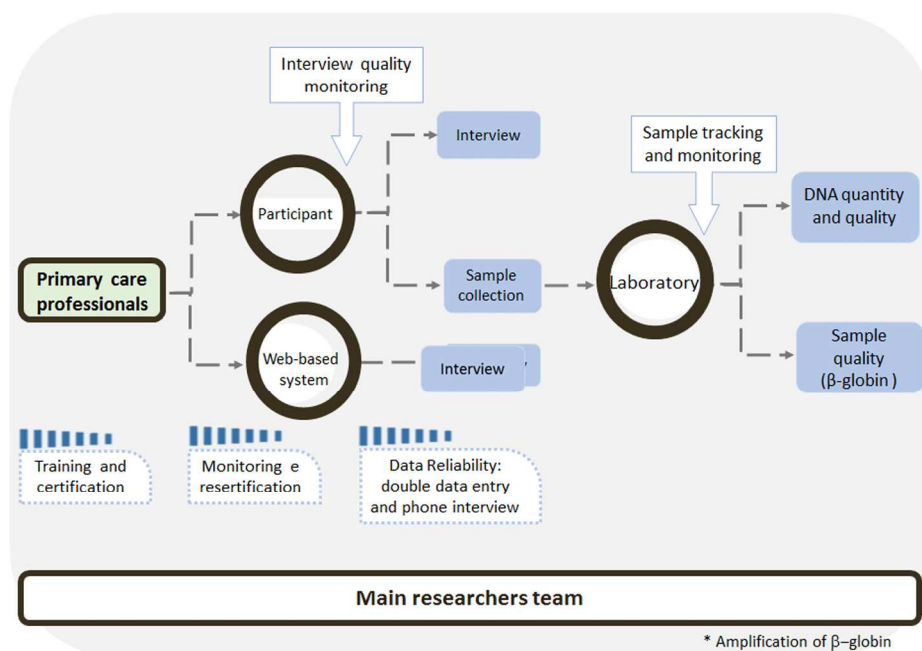

Description of the study quality control major steps during each phase of the study.

297x209mm (300 x 300 DPI)



# BMJ Open

## POP-Brazil Study Protocol: a nationwide cross-sectional evaluation of the prevalence and genotype distribution of human papillomavirus (HPV) in Brazil

|                                 |                                                                                                                                                                                                                                                                                                                                                                                                                                                                                                                                                                                                                                                                                                                                                                                                                                                                                                                                                                                                                                                                                                                                                                                                     |
|---------------------------------|-----------------------------------------------------------------------------------------------------------------------------------------------------------------------------------------------------------------------------------------------------------------------------------------------------------------------------------------------------------------------------------------------------------------------------------------------------------------------------------------------------------------------------------------------------------------------------------------------------------------------------------------------------------------------------------------------------------------------------------------------------------------------------------------------------------------------------------------------------------------------------------------------------------------------------------------------------------------------------------------------------------------------------------------------------------------------------------------------------------------------------------------------------------------------------------------------------|
| Journal:                        | <i>BMJ Open</i>                                                                                                                                                                                                                                                                                                                                                                                                                                                                                                                                                                                                                                                                                                                                                                                                                                                                                                                                                                                                                                                                                                                                                                                     |
| Manuscript ID                   | bmjopen-2017-021170.R1                                                                                                                                                                                                                                                                                                                                                                                                                                                                                                                                                                                                                                                                                                                                                                                                                                                                                                                                                                                                                                                                                                                                                                              |
| Article Type:                   | Protocol                                                                                                                                                                                                                                                                                                                                                                                                                                                                                                                                                                                                                                                                                                                                                                                                                                                                                                                                                                                                                                                                                                                                                                                            |
| Date Submitted by the Author:   | 12-Mar-2018                                                                                                                                                                                                                                                                                                                                                                                                                                                                                                                                                                                                                                                                                                                                                                                                                                                                                                                                                                                                                                                                                                                                                                                         |
| Complete List of Authors:       | <p>WENDLAND, ELIANA; Hospital Moinhos de Vento; Federal University of Health Science of Porto Alegre<br/>           Caierao, Juliana; Moinhos de Vento Hospital<br/>           Domingues, Carla; Brazilian Ministry of Health, National Immunization Program<br/>           Maranhão, Ana ; Brazilian Ministry of Health, National Immunization Program<br/>           de Souza, Flávia; Brazilian Ministry of Health, Department of Surveillance, Prevention and Control of Sexually Transmitted Infections, HIV/AIDS and Viral Hepatitis<br/>           Hammes, Luciano; Hospital Moinhos de Vento<br/>           Falavigna, Maicon; Hospital Moinhos de Vento<br/>           Hilgert, Juliana; Universidade Federal do Rio Grande do Sul, Department of Preventive and Social Odontology<br/>           Hugo, Fernando; Federal University of Rio Grande do Sul, Department of Preventive and Social Odontology<br/>           Bessel, Marina; Hospital Moinhos de Vento<br/>           Villa, Luisa Lina; Universidade de Sao Paulo Faculdade de Medicina<br/>           Benzaken, Adele; Ministry of Health, Department of STDs/Aids and Viral Hepatitis. Health Surveillance Secretariat.</p> |
| <b>Primary Subject Heading</b>: | Epidemiology                                                                                                                                                                                                                                                                                                                                                                                                                                                                                                                                                                                                                                                                                                                                                                                                                                                                                                                                                                                                                                                                                                                                                                                        |
| Secondary Subject Heading:      | Sexual health, Public health, Infectious diseases                                                                                                                                                                                                                                                                                                                                                                                                                                                                                                                                                                                                                                                                                                                                                                                                                                                                                                                                                                                                                                                                                                                                                   |
| Keywords:                       | nationwide study, HPV infection, anogenital, prevalence, Brazil, EPIDEMOLOGY                                                                                                                                                                                                                                                                                                                                                                                                                                                                                                                                                                                                                                                                                                                                                                                                                                                                                                                                                                                                                                                                                                                        |
|                                 |                                                                                                                                                                                                                                                                                                                                                                                                                                                                                                                                                                                                                                                                                                                                                                                                                                                                                                                                                                                                                                                                                                                                                                                                     |

SCHOLARONE™  
Manuscripts

1  
2  
3 1 **POP-Brazil Study Protocol: A nationwide cross-sectional evaluation of the prevalence and**  
4  
5 2 **genotype distribution of human papillomavirus (HPV) in Brazil**  
6  
7  
8 3

9  
10 4 Eliana Marcia Wendland<sup>1,2</sup>, Juliana Caierão<sup>1</sup>, Carla Domingues<sup>3</sup>, Ana Goretti Kalume  
11  
12 5 Maranhão<sup>3</sup>, Flavia Moreno Alves de Souza<sup>4</sup>, Luciano Serpa Hammes<sup>1</sup>, Maicon Falavigna<sup>1,5</sup>,  
13  
14 6 Juliana Balbinot Hilgert<sup>6</sup>, Fernando Hugo<sup>6</sup>, Marina Bessel<sup>1</sup>, Luisa Lina Villa<sup>7</sup>, Adele Schwartz  
15  
16 7 Benzaken<sup>3</sup>  
17  
18

19 8  
20  
21 9 <sup>1</sup>Hospital Moinhos de Vento. Porto Alegre, Brazil

22  
23 10 <sup>2</sup>Federal University of Health Science of Porto Alegre. Community Health Department. Porto  
24  
25 11 Alegre, Brazil

26  
27 12 <sup>3</sup>National Immunization Program, Brazilian Ministry of Health. Brasília, Brazil

28  
29 13 <sup>4</sup>Department of Surveillance, Prevention and Control of Sexually Transmitted Infections,  
30  
31 14 HIV/AIDS and Viral Hepatitis, Brazilian Ministry of Health. Brasilia, Brazil

32  
33 15 <sup>5</sup>National Institute for Health Technology Assessment, Federal University of Rio Grande do Sul,  
34  
35 16 Porto Alegre, Brazil

36  
37 17 <sup>6</sup>Department of Preventive and Social Odontology, Federal University of Rio Grande do Sul,  
38  
39 18 Porto Alegre, Brazil

40  
41 19 <sup>7</sup>Universidade de São Paulo and Instituto do Cancer do Estado de São Paulo (ICESP) São Paulo,  
42  
43 20 Brazil

44  
45 21  
46  
47 22 **Corresponding author**

48  
49 23 Eliana Marcia Wendland  
50  
51  
52  
53  
54  
55  
56  
57  
58  
59  
60

1  
2  
3 24 Rua Ramiro Barcelos 910. 90035-000. Porto Alegre, Brazil  
4

5 25 E-mail: eliana.wendland@hmv.org.br  
6

7  
8 26 Tel.: +55 51 3314 3600  
9

10 27  
11

12 28 **Word count:** 2,712  
13

14 29  
15  
16  
17  
18  
19  
20  
21  
22  
23  
24  
25  
26  
27  
28  
29  
30  
31  
32  
33  
34  
35  
36  
37  
38  
39  
40  
41  
42  
43  
44  
45  
46  
47  
48  
49  
50  
51  
52  
53  
54  
55  
56  
57  
58  
59  
60

For peer review only

1  
2  
3 **30 ABSTRACT**  
4

5 **31 Introduction:** Human papillomavirus (HPV) is associated with the development of genital warts  
6  
7  
8 **32** and different types of cancer, including virtually all cervical cancers and a considerable number  
9  
10 **33** of penile, anal and oropharyngeal cancers. Data regarding the prevalence of HPV infection in  
11  
12 **34** Brazil are limited and fragmented. We aim to determine HPV prevalence in sexually active  
13  
14 **35** women and men from 16 to 25 years old and to investigate regional differences in virus  
15  
16 **36** prevalence and types. **Methods and analysis:** This is a nationwide, multi-centric, cross-  
17  
18 **37** sectional, prospective study that will include participants from 16 to 25 years old from all  
19  
20 **38** Brazilian capital cities. Recruitment will occur in primary health units by trained health  
21  
22 **39** professionals who will be responsible for collecting biological samples and interviewing the  
23  
24 **40** volunteers. After signing informed consent, all participants will answer a questionnaire that will  
25  
26 **41** collect sociodemographic and behavioral data. All samples will be processed in a certified  
27  
28 **42** central laboratory, and strict quality control will be performed by many different procedures,  
29  
30 **43** including double data entry, training and certification of primary care health professionals  
31  
32 **44** responsible for data collection, simulation of interviews and auditing and monitoring of visits.  
33  
34 **45** The sample size will be standardized based on the population distribution of each capital using  
35  
36 **46** SAS<sup>®</sup> and R statistical software. **Ethics and dissemination:** The project was approved by the  
37  
38 **47** Research Ethics Committee of the main institution and the corresponding ethics committees of  
39  
40 **48** the recruitment sites. This will be the first Brazilian nationwide study to determine overall HPV  
41  
42 **49** prevalence and to examine regional differences and social, demographic and behavioral factors  
43  
44 **50** related to HPV infection. Critical analysis of the study results will contribute to epidemiological  
45  
46 **51** knowledge and will set a baseline for future evaluation of the impact of the National HPV  
47  
48 **52** Vaccination Program.  
49  
50  
51  
52  
53  
54  
55  
56  
57  
58  
59  
60

1  
2  
3 53  
45 54 **Keywords:** HPV infection, prevalence, nationwide study, Brazil, anogenital  
6  
78 55  
910 56 **Strengths and limitations of this study**  
1112 57 • Representativeness of all regions of Brazil.  
1314 58 • Establishment of a baseline to evaluate the effectiveness of the HPV vaccination program  
15 in Brazil.  
16  
17 5918  
19 60 • Recruitment done in primary care units, inviting all people within the age range living in  
20 the area and not over representing risk factor groups.  
21  
22 6123  
24 62 • Only the population that uses the primary care units from the public health system will be  
25 included, but that consists of 71% of the Brazilian population.  
26  
27 6328 64  
29  
30  
31  
32  
33  
34  
35  
36  
37  
38  
39  
40  
41  
42  
43  
44  
45  
46  
47  
48  
49  
50  
51  
52  
53  
54  
55  
56  
57  
58  
59  
60

## 65 INTRODUCTION

66 According to the World Health Organization (WHO), more than 528,000 incident cases  
67 and approximately 270,000 deaths due to cervical cancer occur annually worldwide, 85% of  
68 which occur in low- and middle-income countries [1]. Virtually all these cancers are preceded by  
69 infection with high-risk oncogenic human papillomaviruses (HR-HPVs) [2], and HPV types 16  
70 and 18 are associated with 70% of these cases [3,4] In Brazil, the National Institute of Cancer  
71 estimated that there were 16,340 new cervical carcinoma cases in 2016, with a 33.23% mortality  
72 rate [5].

73 HR-HPVs are also responsible for 63% of penile cancers, 89% of anal cancers and 72%  
74 of oropharyngeal cancers in men [6,7]. Indeed, these viruses are now recognized as the major  
75 cause of the observed rising incidence rates of oropharyngeal squamous cell carcinoma; indeed,  
76 the primary risk factor for developing this cancer is oral HPV infection [8].

77 Most sexually active individuals will be infected by HPV at some point in their lives  
78 [9,10]. In Brazil, the prevalence of HPV infection in women with normal cervical cytology  
79 varies from 2.3% to 55.4% [11,12]. Considerable variability in HPV prevalence rates for other  
80 body sites, such as the penile epithelium and the oral cavity, are also observed in Brazil [11,12].

81 These data originated from studies that were heterogeneous with regard to methodology  
82 and/or the study population. In addition, virtually all studies to date were geographically  
83 restricted [13–17] and/or focused on specific groups of individuals, such as HIV-positive,  
84 pregnant and immunosuppressed patients [18–20]. Moreover, some of those studies recruited  
85 participants from clinics specializing in sexually transmitted infections, resulting in selection bias  
86 and inflation of the estimated prevalence [13–20].

1  
2  
3 87 Vaccination against HPV is being performed in many countries, and it is a method of  
4  
5 88 primary prevention of cancer and HPV infection [9]. Since 2014, the Brazilian Ministry of  
6  
7 89 Health has provided a quadrivalent (types 6, 11, 16 and 18) vaccine for women from 9-14 years  
8  
9 90 old, with a schedule of 0 and 6 months. In January 2017, Brazil was the first country in Latin  
10  
11 91 America to extend vaccination to men (11-14 years old) [21]. Baseline data of HPV prevalence  
12  
13 92 before vaccinations are vital in order to establish the impact of vaccination on the distribution of  
14  
15 93 HPV types.

16  
17  
18  
19 94 As far as we know, this is the first study presenting a nationwide scope with uniform  
20  
21 95 methodology to evaluate the Brazilian prevalence of HPV and its types, as well as to compare  
22  
23 96 the prevalence among specific geographical regions that present marked differences in social,  
24  
25 97 demographic, cultural and economic characteristics. In addition, the study will describe the  
26  
27 98 social, demographic, economic and behavioral factors associated with HPV positivity.  
28  
29  
30

31 99

## 32 33 100 **OBJECTIVES**

34  
35 101 The primary objective of the study is to determine the prevalence of HPV in women and  
36  
37 102 men aged 16-25 years in Brazil, evaluating the most prevalent types and possible differences  
38  
39 103 between regions and risk factors associated with positivity to establish a baseline for evaluation  
40  
41 104 of vaccine effectiveness.  
42  
43

44 105

### 45 46 47 106 **Secondary objectives**

- 48  
49 107 • To determine the prevalence of HPV, high-risk types, genital warts and the  
50  
51 108 associated sexual behaviors;  
52  
53  
54  
55  
56  
57  
58  
59  
60

- 1  
2  
3 109 • To evaluate the co-infection of HPV-HIV in the young population that uses the  
4  
5 110 public health system;  
6  
7  
8 111 • To investigate beliefs and knowledge about HPV infection and vaccination in a  
9  
10 112 young population;  
11  
12 113 • To evaluate the association of other sexually transmitted infections (STIs),  
13  
14 114 such as syphilis, with the presence of HPV;  
15  
16  
17 115 • To evaluate the herd effect in a sample of unvaccinated men.  
18  
19  
20 116

## 21 22 117 **METHODS AND ANALYSIS**

### 23 24 118 25 26 119 **Design**

27  
28  
29 120 We will use a cross-sectional, nationwide, multi-centric design to establish a baseline  
30  
31 121 dataset that will enable prevalence comparison over time.  
32

### 33 122 34 35 123 **Recruitment and sample size**

36  
37  
38 124 Beginning in January 2017, sexually active women and men from 16 to 25 years old who  
39  
40 125 use the public health system in all 26 Brazilian capitals plus the Federal District of Brasilia  
41  
42 126 across the five geographical regions will be recruited through public primary care units

43  
44  
45 127 Because endocervical collection is not recommended during pregnancy in Brazil and/or  
46  
47 128 to avoid selection bias, the following exclusion criteria will be applied: pregnant women, those  
48  
49 129 who delivered a baby in the last 3 months, those who have undergone a hysterectomy or  
50  
51 130 trachelectomy and those who have ever had cervical intraepithelial neoplasia grade 2 or higher  
52  
53  
54 131 will be considered ineligible for the study.  
55  
56  
57  
58  
59  
60



1  
2  
3 132           There will be no exclusion based on HPV vaccination status, but we will investigate  
4  
5 133 whether the participants have been vaccinated. Since the vaccination program was launched in  
6  
7 134 2014 for women who were 9-13 years old and our study population is among 16-25-year-olds,  
8  
9  
10 135 we believe that most of the volunteers will be not have been vaccinated.

11  
12 136           The primary care units in each city were selected based on their representativeness of the  
13  
14 137 health districts and based on their resources to collect and store oral samples. Most of these units  
15  
16 138 have a defined territory and a list of all people within the age range. When the list is available, all  
17  
18 139 participants will be invited. When the list is not available, participants will be recruited by  
19  
20 140 different approaches: (i) eligible individuals who came to the unit for any reason not associated  
21  
22 141 with the main study's outcome; (ii) personal invitation by the community health agents; and (iii)  
23  
24 142 invitation by nurses in the school-based health promotion program. The study sample size (7,935  
25  
26 143 individuals) was calculated to detect differences of 5% in HPV prevalence between regions with  
27  
28 144 a power of 80% and an alpha error of 5% for women using an estimate of 30% [22] for the  
29  
30 145 prevalence of HPV in Brazil. This sample size will allow an estimate with an error between 1.6%  
31  
32 146 and 5.7%, according to sex.

33  
34  
35 147           The sample size will be purposely equal in all regions (1,587 individuals) to maximize  
36  
37 148 the diversity in less populated areas and will be standardized by the Brazilian population of each  
38  
39 149 region during analyses.

40  
41  
42 150

## 43 44 45 151 **Measurements**

46  
47  
48 152

49  
50  
51 153 Sociodemographic variables  
52  
53  
54  
55  
56  
57  
58  
59  
60

1  
2  
3 154 Participants will be asked to answer questions regarding age, gender, race/skin color,  
4  
5 155 household characteristics, relationship status, educational level, occupational status, last-month  
6  
7 156 family income and the number of people dependent on this income.  
8  
9

10 157  
11  
12 158 Smoking, alcohol and other drugs  
13  
14 159 Questions concerning current and past smoking habits, including quantity and frequency,  
15  
16 160 will be asked of the participants. Moreover, the interview includes questions about the use of  
17  
18 161 alcohol and other drugs such as marijuana, cocaine, ecstasy, crack, and the abuse of morphine or  
19  
20 162 other licit and illicit drugs.  
21  
22  
23

24 163  
25  
26 164 Sexual and reproductive health  
27

28 165 Participants will be asked to supply details about their age at first sexual intercourse, their  
29  
30 166 involvement in same sex relationships, their use of condoms, the number of sexual partners, their  
31  
32 167 sexual practices and the presence of any genital symptoms during or after sexual intercourse such  
33  
34 168 as pain or bleeding.  
35  
36

37 169 Their age of menarche, the number of pregnancies and deliveries, the number of  
38  
39 170 abortions, their use of contraceptive methods and the occurrence of sexually transmitted  
40  
41 171 infections will be asked of participants to evaluate their sexual health. All suspicious HPV-  
42  
43 172 related lesions will be photographed for future evaluation.  
44  
45

46 173  
47  
48 174 Knowledge about HPV, vaccination and screening tests  
49

50 175 We will measure how much participants know about HPV and vaccination (when and  
51  
52 176 who must receive the vaccine). The questionnaire is based on Saulle et al [23]. Moreover,  
53  
54  
55  
56  
57  
58  
59

1  
2  
3 177 participants will be asked if they know about Pap smears, if they have already received the exam  
4  
5 178 and if so, if any alteration was ever observed.  
6  
7

8 179

9  
10 180 HPV frequency and type  
11

12 181 We will measure the proportion of the sample that is infected by HPV, and we will look  
13  
14 182 at the prevalence of high-risk types and the most prevalent types in the genital and oropharyngeal  
15  
16 183 sites. Additionally, we will investigate the presence of chronic lesions (lasting 15 days or more)  
17  
18 184 in the oral cavity that are related to the presence of HPV.  
19  
20

21 185

## 22 186 **Outcomes**

23  
24  
25  
26 187 The nationwide prevalence of HPV in the genitals is the major outcome. Secondary  
27  
28 188 outcomes include the prevalence of specific HPV types, the comparison of prevalence between  
29  
30 189 Brazilian regions, and the prevalence of HR-HPVs and LR-HPVs.  
31  
32

33 190

## 34 191 **Procedures**

35  
36  
37 192 All individuals will respond to a standardized interview based on validated instruments  
38  
39 193 [23–26]. After the interview, samples from the oral cavity and cervical or penile/scrotal sites will  
40  
41 194 be collected from each participant.  
42  
43

44 195 An online platform for data entry will be used by primary care professionals to add  
45  
46 196 participant data, biological sample information and photographs. The same platform will be used  
47  
48 197 for study process control and to allow availability of the results to primary care health  
49  
50 198 professionals. Participants will have access to an external webpage where they will be able find  
51  
52 199 information about their results, as protected by a password provided during interview. In cases in  
53  
54  
55  
56  
57  
58  
59  
60

1  
2  
3 200 which high-risk HPV infection is detected, those participants will be asked to return to the  
4  
5 201 primary care unit to be informed about the result.  
6

7  
8 202 Oral samples will be obtained through mouthwash and gargle cycles by using 10 ml of a  
9  
10 203 standardized commercial mouthwash. The samples will be obtained in 3 cycles of 5 seconds each  
11  
12 204 and will be stored in a 15-ml Falcon tube identified with a five digit number bar code and the  
13  
14 205 date of collection.  
15

16  
17 206 Cervical samples will be obtained using the Digene<sup>®</sup> HC2 DNA Collection kit (Qiagen)  
18  
19 207 and placed in 1 ml of Specimen Transport Medium (STM), according to the manufacturer's  
20  
21 208 instructions.  
22

23  
24 209 Penile (penile shaft, glans penis/coronal sulcus) and scrotum samples will be obtained  
25  
26 210 using a Dacron swab (Qiagen) previously moistened in sterile saline solution. Collection will be  
27  
28 211 performed by intensely pressing and rubbing the swab in the epithelium via self-collection under  
29  
30 212 supervision of the primary care health professional and after instruction regarding the procedure.  
31  
32

33 213 All biological samples will be maintained at room temperature (15°C to 25°C) according to  
34  
35 214 manufacturer's instructions and transported to a central lab in Porto Alegre to start the specimen  
36  
37 215 processing. The temperature will be monitored with a data logger. Figure 1 presents the general  
38  
39 216 logistics for the nationwide multicenter collection of data and specimens.  
40  
41

42 217 Individuals who present visible lesions on the genitals or in the oral cavity at the time of  
43  
44 218 recruitment will be asked to grant permission for a picture to be taken of the lesion.  
45  
46

47 219

#### 48 49 220 Specimen processing 50

51 221 All samples will be treated as biohazardous material, and all specimen handling will be  
52  
53 222 performed in a biosafety cabinet. In the laboratory, specimens will be immediately aliquoted.  
54  
55  
56  
57  
58  
59  
60

1  
2  
3 223 One aliquot will be maintained at -80°C as a backup. Another aliquot will be processed for DNA  
4  
5 224 extraction from the STM medium using magnetic beads for isolation and purification using the  
6  
7 225 automatized extraction platform (MagNA Pure LC 2.0, Roche Molecular Systems)), after  
8  
9 226 exposed to an enzymatic treatment with proteinase K, following the manufacturer's instruction.

10  
11  
12 227 HPV detection and typing will be done using the Linear Array<sup>®</sup> HPV Genotyping Test  
13  
14 228 (Roche Diagnostics), which is based on PCR amplification (450-bp fragment of the polymorphic  
15  
16 229 region of the L1 gene of HPV), followed by specific hybridization and colorimetric detection,  
17  
18 230 according to the manufacturer's instructions. The test detects HR-HPVs (16, 18, 31, 33, 35, 39,  
19  
20 231 45, 51, 52, 56, 58, 59 and 68) and LR-HPVs (6, 11, 26, 40, 42, 53, 54, 55, 61, 62, 64, 66, 67, 69,  
21  
22 232 70, 71 72, 73, 81, 82, 83, 84, IS39 and CP6198), for a total of 37 types. The amplification of  
23  
24 233 human  $\beta$ -globin (biotinylated primers GH20 and PC04, 268-bp fragment) is used as an internal  
25  
26 234 control for the PCR. To ensure reproducibility of LA, an automated AutoBlot instrument  
27  
28 235 (Fujirebio) was used for hybridization and wash steps. Real-time PCR using the TaqMan system  
29  
30 236 for HPV type 52 will be performed to confirm the results obtained by Roche's test as a  
31  
32 237 combination of HPV types 52, 33, 35 and 58.  
33  
34  
35  
36  
37  
38  
39

#### 40 239 **Data analyses and statistics**

41  
42 240 Categorical variables will be summarized using absolute frequencies and percentage,  
43  
44 241 while continuous variables will be analyzed using means and standard error. Chi-squared tests  
45  
46 242 and Fisher's exact tests will be used to compare proportions, and t-tests or Mann-Whitney non-  
47  
48 243 parametric tests will be used for continuous variables.  
49  
50  
51  
52  
53  
54  
55  
56  
57  
58  
59  
60

1  
2  
3 244 The association between HPV infection and social and behavioral variables will be  
4  
5 245 defined by calculating crude and adjusted prevalence ratios. Confounding variables will be  
6  
7  
8 246 evaluated using modified Poisson regression analysis [27].  
9

10 247 To maximize diversity across regions, we have divided the sample size into equal  
11  
12 248 numbers among regions. To adjust the distribution of the sample to the study population, we will  
13  
14 249 standardize the measures by the size of the population in each capital within the age range and by  
15  
16  
17 250 sex.  
18

19 251

### 21 252 **Monitoring and quality control**

23  
24 253 The data quality will be validated by routine practices. A pilot study was performed to  
25  
26 254 identify and correct problems in data collection, sample transportation, procedures and  
27  
28 255 instruments. All health professionals involved in the research are trained and certified by the  
29  
30  
31 256 coordinator team using simulated interview and sample collection according to the study  
32  
33 257 protocol, as described in the POP-Brazil operations manuals.  
34

35 258 Data and specimen collection are periodically evaluated by reports generated by the data  
36  
37 259 system, including information about the number of participants and the number of refusals, and  
38  
39 260 the quality of the samples collected. Those reports will be distributed monthly to all people  
40  
41  
42 261 involved in data collection.  
43

44 262 Moreover, each unit will receive at least one *in loco* monitoring visit, which will be done  
45  
46 263 by research staff supervisors to evaluate protocol compliance and provide recertification.  
47  
48 264 Supervisors will observe techniques utilizing predefined check lists and recorded interviews.  
49  
50

51 265 The biological sample tracking is done through the web-based data platform, and time,  
52  
53  
54 266 temperature and sample conditions are evaluated on a daily basis.  
55  
56  
57  
58  
59  
60

1  
2  
3 267 To access the reliability of the interviews, a subsample will be obtained in duplicate. A  
4  
5 268 resampling will be done in 10% of the interviews using phone calls to access the coefficient of  
6  
7 269 variation and systematic differences between data. Figure 2 presents the steps that will be taken  
8  
9  
10 270 for quality assurance. The reliability of HPV detection will be accessed by double processing a  
11  
12 271 random subsample of the biological genital samples by the Centers for Disease Control and  
13  
14 272 Prevention.  
15

16 273

## 19 274 **DISCUSSION**

21 275 This is the first Brazilian nationwide study to determine HPV prevalence and the social,  
22  
23 276 demographic and behavioral factors related to HPV infection. Critical analysis of the study  
24  
25 277 results will contribute to epidemiological knowledge of the distribution of HPV strains across  
26  
27 278 geographical regions and will establish a baseline to evaluate the impact of the Brazilian  
28  
29 279 Vaccination Program.  
30  
31

32  
33 280 There are some limitations of this study. The sampling is not random. Brazil is a large  
34  
35 281 country, and due to logistic reasons, the sampling is restricted to state capitals in public health  
36  
37 282 units selected by the local government. To minimize selection bias, in addition to recruiting  
38  
39 283 participants that voluntarily come to the health unit, we will also recruit at schools, through the  
40  
41 284 list of patients of the selected health units, and by personal invitation by community health  
42  
43 285 agents in households. We are also only recruiting participants in the public health system, whom  
44  
45 286 account for approximately 70% of the overall Brazilian population; therefore, we cannot draw  
46  
47 287 inferences about people who exclusively use the private sector. In Brazil, the private sector is  
48  
49 288 mainly used by social classes A and B, but it is important to highlight that for some services such  
50  
51 289 as vaccination, the Public Health System covers virtually 100% of the population.  
52  
53  
54  
55  
56  
57  
58  
59  
60

1  
2  
3 290 The strengths of the study are the establishment of a baseline for future comparison of  
4  
5 291 HPV prevalence, the nationwide sampling, including a large and diverse population and the use  
6  
7 292 of central laboratory and techniques for data quality monitoring. Additionally, we will collect  
8  
9  
10 293 data on sexual behaviors and other STIs, making it possible to pursue some explanation  
11  
12 294 regarding differences in prevalence according to specific groups of participants.

13  
14 295 Health managers, based on these data, will be able to compare HPV prevalence in  
15  
16 296 different regions according to population characteristics; it will be possible to support the  
17  
18 297 development of strategies to promote HPV vaccination and to develop strategies for prevention,  
19  
20 298 taking into account regional differences. Moreover, these data will serve as a baseline for future  
21  
22 299 comparisons and will allow monitoring of the effectiveness of the National HPV Vaccination  
23  
24 300 Program.

25  
26  
27  
28 301

## 30 302 **ETHICS AND DISSEMINATION**

31  
32  
33 303 Before starting the study, this project was submitted to the Research Ethical Committee  
34  
35 304 of the proposing institution (Hospital Moinhos de Vento). Following approval, agreements were  
36  
37 305 made by all co-participant centers and submitted to their corresponding ethical committees.

38  
39  
40 306 Individuals must voluntarily agree to participate and must sign the free and informed  
41  
42 307 consent form. The study follows the ethical recommendations of Resolutions 347/05, 441/11 and  
43  
44 308 466/12 of the National Health Council.

45  
46  
47 309 In cases of no infection or infection with a low-risk HPV type, participants will be  
48  
49 310 informed of negative results via web access. Conversely, participants infected with high-risk  
50  
51 311 HPV types will be advised to go to the health care unit for their results, where they will be



1  
2  
3 312 oriented about the meaning of the result and instructed about follow-up according to national  
4  
5 313 guidelines.  
6

7  
8 314 Preliminary results will be presented as poster and/or oral sections in national and  
9  
10 315 international congresses, and the final results will be submitted for publishing in peer-reviewed  
11  
12 316 open-access journals. The results will also be presented in a personal meeting to the Ministry of  
13  
14 317 Health of Brazil.  
15

16  
17 318  
18  
19  
20  
21  
22  
23  
24  
25  
26  
27  
28  
29  
30  
31  
32  
33  
34  
35  
36  
37  
38  
39  
40  
41  
42  
43  
44  
45  
46  
47  
48  
49  
50  
51  
52  
53  
54  
55  
56  
57  
58  
59  
60

319 **REFERENCES**

- 320 1 Globocan. Home. 2012. <http://globocan.iarc.fr/Default.aspx> (accessed 1 Dec 2017).
- 321 2 Walboomers JM, Jacobs MV, Manos MM, et al. Human papillomavirus is a necessary  
322 cause of invasive cervical cancer worldwide. *J Pathol* 1999;189:12–9.  
323 doi:10.1002/(SICI)1096-9896(199909)189:1<12::AID-PATH431>3.0.CO;2-F
- 324 3 Bosch FX, Lorincz A, Muñoz N, et al. The causal relation between human  
325 papillomavirus and cervical cancer. *J Clin Pathol* 2002;55:244–65.
- 326 4 Guan P, Howell-Jones R, Li N, et al. Human papillomavirus types in 115,789 HPV-  
327 positive women: A meta-analysis from cervical infection to cancer. *Int J Cancer*  
328 2012;131:2349–59. doi:10.1002/ijc.27485
- 329 5 Portal - Instituto Nacional de Câncer - INCA.  
330 <http://www2.inca.gov.br/wps/wcm/connect/inca/portal/home> (accessed 1 Dec 2017).
- 331 6 Serrano B, Brotons M, Bosch FX, et al. Epidemiology and burden of HPV-related  
332 disease. *Best Pract Res Clin Obstet Gynaecol* 2018;47:14-26.  
333 doi:10.1016/j.bpobgyn.2017.08.006
- 334 7 Han JJ, Tarney CM, Song J. Variation in genital human papillomavirus infection  
335 prevalence and vaccination coverage among men and women in the USA. *Future Oncol*  
336 *Lond Engl* 2017;13:1129–32. doi:10.2217/fon-2017-0147
- 337 8 Taberna M, Mena M, Pavón MA, et al. Human papillomavirus-related oropharyngeal  
338 cancer. *Ann Oncol* 2017;28:2386–98. doi:10.1093/annonc/mdx304
- 339 9 HPV | Home | Human Papillomavirus | CDC. <https://www.cdc.gov/hpv/index.html>  
340 (accessed 1 Dec 2017).

- 1  
2  
3 341 10 Syrjänen K, Hakama M, Saarikoski S, et al. Prevalence, incidence, and estimated life-  
4  
5 342 time risk of cervical human papillomavirus infections in a nonselected Finnish female  
6  
7 343 population. *Sex Transm Dis* 1990;17:15–9.
- 8  
9  
10 344 11 HPV INFORMATION CENTRE. <http://www.hpvcentre.net/> (accessed 1 Dec 2017).
- 11  
12 345 12 Colpani V, Bidinotto AB, Falavigna M et al. Prevalence of papillomavirus in Brazil: a  
13  
14 346 systematic review protocol. *BMJ Open* 2016;6: e011884.
- 15  
16  
17 347 13 Coser J, da Rocha Boeira T, Wolf JM, et al. Cervical human papillomavirus infection and  
18  
19 348 persistence: a clinic-based study in the countryside from South Brazil. *Braz J Infect Dis*  
20  
21 349 2016;20:61–8. doi:10.1016/j.bjid.2015.10.008
- 22  
23  
24 350 14 de Oliveira GR, Vieira VC, Barral MFM, et al. [Risk factors and prevalence of HPV  
25  
26 351 infection in patients from basic health units of an university hospital in Southern Brazil].  
27  
28 352 *Rev Bras Ginecol Obstet* 2013;35:226–32.
- 29  
30  
31 353 15 Corrêa CM, Teixeira Teixeira NC, Araujo AC, et al. Prevalence and multiplicity of HPV  
32  
33 354 in HIV women in Minas Gerais, Brazil. *Rev Assoc Med Bras* 2011;57:425–30.
- 34  
35  
36 355 16 da Silva MC, Martins HPR, de Souza JL, et al. Prevalence of HPV infection and  
37  
38 356 genotypes in women with normal cervical cytology in the state of Paraná, Brazil. *Arch*  
39  
40 357 *Gynecol Obstet* 2012;286:1015–22. doi:10.1007/s00404-012-2399-y
- 41  
42  
43 358 17 Girianelli VR, Thuler LCS, e Silva GA. [Prevalence of HPV infection among women  
44  
45 359 covered by the family health program in the Baixada Fluminense, Rio de Janeiro, Brazil].  
46  
47 360 *Rev Bras Ginecol Obstet* 2010;32:39–46.
- 48  
49 361 18 Meyrelles ARI, Siqueira JD, Hofer CB, et al. HIV/HPV co-infection during pregnancy in  
50  
51 362 southeastern Brazil: prevalence, HPV types, cytological abnormalities and risk factors.  
52  
53 363 *Gynecol Oncol* 2013;128:107–12. doi:10.1016/j.ygyno.2012.10.003

- 1  
2  
3 364 19 Silva LM, Santos WGD, Santiago MB. Prevalence of cutaneous warts in patients with  
4  
5 365 systemic lupus erythematosus: a systematic review. *J Infect Dev Ctries* 2016;10:902–6.  
6  
7 366 20 Vieira RC, Monteiro JSV, Manso EP, et al. Prevalence of type-specific HPV among  
8  
9 367 female university students from northern Brazil. *Infect Agent Cancer* 2015;10:21.  
10  
11 368 doi:10.1186/s13027-015-0017-x  
12  
13 369 21 HPV | UNA-SUS. <https://www.unasus.gov.br/tags/hpv> (accessed 1 Dec 2017).  
14  
15 370 22 Ayres ARG, Silva GA. Cervical HPV infection in Brazil: systematic review. *Rev Saúde*  
16  
17 371 *Pública* 2010;44:963–74. doi:10.1590/S0034-89102010000500023  
18  
19 372 23 Saulle R, Miccoli S, Unim B, et al. Validation of a questionnaire for young women to  
20  
21 373 assess knowledge, attitudes and behaviors towards cervical screening and vaccination  
22  
23 374 against HPV in Italy. *Epidemiol Biostat Public Health* 2014;11. doi:10.2427/8913  
24  
25 375 24 Critério Brasil - ABEP. <http://www.abep.org/criterio-brasil> (accessed 1 Dec 2017).  
26  
27 376 25 Soares AHR. O aprendizado da sexualidade: reprodução e trajetórias sociais de jovens  
28  
29 377 brasileiros. *Cad Saúde Pública* 2007;23:1495–6. doi:10.1590/S0102-  
30  
31 378 311X2007000600025  
32  
33 379 26 Comportamento sexual da população brasileira e percepções do HIV/Aids | Biblioteca  
34  
35 380 Virtual em Saúde. <http://pesquisa.bvsalud.org/bvsms/resource/pt/mis-3389> (accessed 1  
36  
37 381 Dec 2017).  
38  
39 382 27 Barros AJD, Hirakata VN. Alternatives for logistic regression in cross-sectional studies:  
40  
41 383 an empirical comparison of models that directly estimate the prevalence ratio. *BMC Med*  
42  
43 384 *Res Methodol* 2003;3:21. doi:10.1186/1471-2288-3-21  
44  
45  
46  
47  
48  
49  
50  
51 385

1  
2  
3 386 **AUTHOR CONTRIBUTIONS**  
4

5 387 EMW conceived of the project and participated in all phases of the manuscript preparation; ASB,  
6  
7 388 AGM, LSH, MFAS, JH, FM, LLV, CMD and MB participated in the protocol development; and  
8  
9 389 JC and LLV participated in the laboratory protocol development and helped write the  
10  
11 manuscript. All authors reviewed the final version of the manuscript.  
12  
13

14  
15 391

16  
17 392 **FUNDING**  
18

19 393 This work is financed by Hospital Moinhos de Vento through the Program for Supporting the  
20  
21 394 Institutional Development of the Public Health System (PROADI-SUS), supported by the  
22  
23 395 Ministry of Health of Brazil, with funding participation of the Pan-American Health  
24  
25 396 Organization.  
26  
27

28  
29 397

30  
31 398 **COMPETING INTERESTS**  
32

33 399 ASB, FMAS, CMD and AGM work for the Ministry of Health of Brazil. The other authors  
34  
35 400 declare no conflict of interest. LLV is a consultant for Merck for the HPV quadrivalent vaccine  
36  
37 401 and for Qiagen, BD and Roche for HPV DNA tests.  
38  
39

40  
41 402

42 403 **ACKNOWLEDGMENTS**  
43

44 404 We would like to thank Julian Peto and Claire Gilham from the London School of Hygiene and  
45  
46 405 Tropical Medicine for helping with the development of sampling procedures and Elisabeth  
47  
48 406 Unger and Lauri Markowitz from the Centers for Disease Control and Prevention for providing  
49  
50 407 helpful suggestions in developing the study protocol and quality control.  
51  
52

53  
54 408  
55  
56  
57  
58  
59  
60

1  
2  
3 409 **FIGURE LEGENDS**  
4

5 410 **Figure 1.** Workflow of the study. 1. Data are collected in public health units from all 27  
6  
7 411 Brazilian capitals; 2. Data entry into the web-based system is performed by primary care  
8  
9 412 professionals and is monitored by the main research team in Porto Alegre (Hospital Moinhos de  
10  
11 413 Vento); 3. Paper forms are sent to Porto Alegre along with biological samples, which are  
12  
13 414 processed for DNA extraction (UFCSPA); and 4. Extracted DNA is sent to São Paulo (USP) for  
14  
15 415 HPV detection and typing. Finally, the results are included in the web-based system and are  
16  
17 416 made available for the primary care professionals and participants using a code number and  
18  
19 417 password.  
20  
21  
22  
23

24 418 **Figure 2.** Description of the study's major quality control steps during each phase of the study.  
25  
26  
27  
28  
29  
30  
31  
32  
33  
34  
35  
36  
37  
38  
39  
40  
41  
42  
43  
44  
45  
46  
47  
48  
49  
50  
51  
52  
53  
54  
55  
56  
57  
58  
59  
60

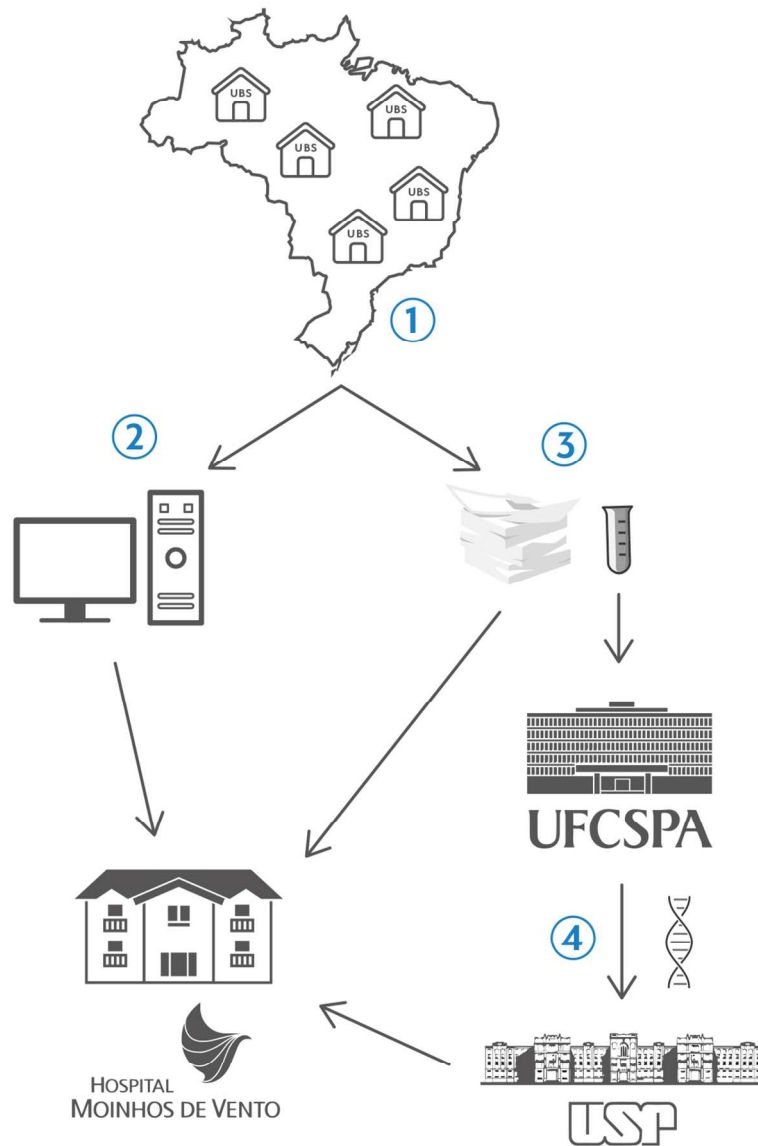

Workflow of the study. 1. Data are collected in Public Health Units from all 27 Brazilian capitals; 2. Data entry on the web-based system are performed by primary care professionals and are monitored by main research team in Porto Alegre (Hospital Moinhos de Vento); 3. Paper forms are sent to Porto Alegre along with biological samples, which are processed for DNA extraction (UFCSPA); 4. Extracted DNA are sent to São Paulo (USP) for HPV detection and typing. Finally, results are included on the web-based system and became available for primary care professionals and participants.

106x143mm (300 x 300 DPI)

1  
2  
3  
4  
5  
6  
7  
8  
9  
10  
11  
12  
13  
14  
15  
16  
17  
18  
19  
20  
21  
22  
23  
24  
25  
26  
27  
28  
29  
30  
31  
32  
33  
34  
35  
36  
37  
38  
39  
40  
41  
42  
43  
44  
45  
46  
47  
48  
49  
50  
51  
52  
53  
54  
55  
56  
57  
58  
59  
60

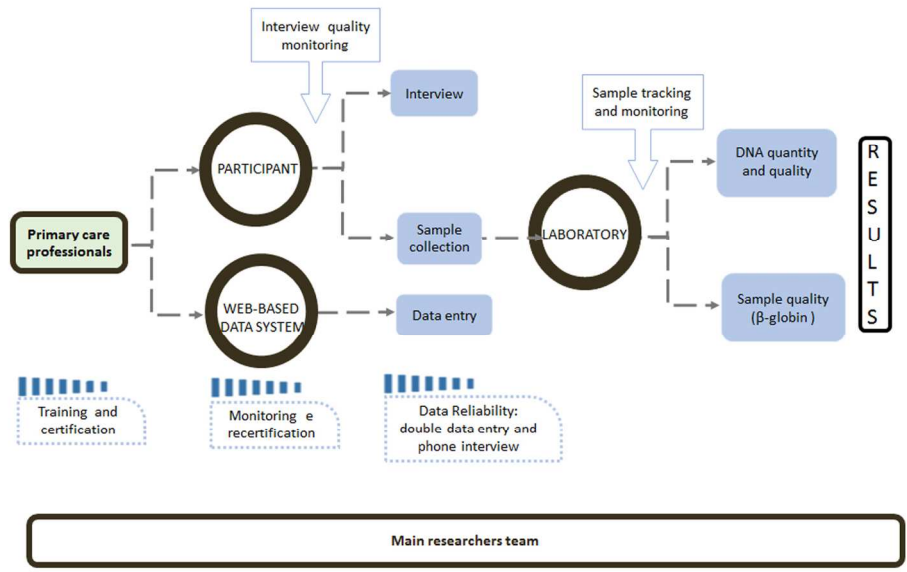

Description of the study's major quality control steps during each phase of the study.

150x99mm (300 x 300 DPI)

view only



# BMJ Open

## POP-Brazil Study Protocol: a nationwide cross-sectional evaluation of the prevalence and genotype distribution of human papillomavirus (HPV) in Brazil

|                                 |                                                                                                                                                                                                                                                                                                                                                                                                                                                                                                                                                                                                                                                                                                                                                                                                                                                                                                                                                                                                                                                          |
|---------------------------------|----------------------------------------------------------------------------------------------------------------------------------------------------------------------------------------------------------------------------------------------------------------------------------------------------------------------------------------------------------------------------------------------------------------------------------------------------------------------------------------------------------------------------------------------------------------------------------------------------------------------------------------------------------------------------------------------------------------------------------------------------------------------------------------------------------------------------------------------------------------------------------------------------------------------------------------------------------------------------------------------------------------------------------------------------------|
| Journal:                        | <i>BMJ Open</i>                                                                                                                                                                                                                                                                                                                                                                                                                                                                                                                                                                                                                                                                                                                                                                                                                                                                                                                                                                                                                                          |
| Manuscript ID                   | bmjopen-2017-021170.R2                                                                                                                                                                                                                                                                                                                                                                                                                                                                                                                                                                                                                                                                                                                                                                                                                                                                                                                                                                                                                                   |
| Article Type:                   | Protocol                                                                                                                                                                                                                                                                                                                                                                                                                                                                                                                                                                                                                                                                                                                                                                                                                                                                                                                                                                                                                                                 |
| Date Submitted by the Author:   | 24-Apr-2018                                                                                                                                                                                                                                                                                                                                                                                                                                                                                                                                                                                                                                                                                                                                                                                                                                                                                                                                                                                                                                              |
| Complete List of Authors:       | WENDLAND, ELIANA; Hospital Moinhos de Vento; Federal University of Health Science of Porto Alegre<br>Caierao, Juliana; Moinhos de Vento Hospital<br>Domingues, Carla; Brazilian Ministry of Health, National Immunization Program<br>Maranhão, Ana ; Brazilian Ministry of Health, National Immunization Program<br>de Souza, Flávia; Brazilian Ministry of Health, Department of Surveillance, Prevention and Control of Sexually Transmitted Infections, HIV/AIDS and Viral Hepatitis<br>Hammes, Luciano; Hospital Moinhos de Vento<br>Falavigna, Maicon; Hospital Moinhos de Vento<br>Hilgert, Juliana; Universidade Federal do Rio Grande do Sul, Department of Preventive and Social Odontology<br>Hugo, Fernando; Federal University of Rio Grande do Sul, Department of Preventive and Social Odontology<br>Bessel, Marina; Hospital Moinhos de Vento<br>Villa, Luisa Lina; Universidade de Sao Paulo Faculdade de Medicina<br>Benzaken, Adele; Ministry of Health, Department of STDs/Aids and Viral Hepatitis. Health Surveillance Secretariat. |
| <b>Primary Subject Heading</b>: | Epidemiology                                                                                                                                                                                                                                                                                                                                                                                                                                                                                                                                                                                                                                                                                                                                                                                                                                                                                                                                                                                                                                             |
| Secondary Subject Heading:      | Sexual health, Public health, Infectious diseases                                                                                                                                                                                                                                                                                                                                                                                                                                                                                                                                                                                                                                                                                                                                                                                                                                                                                                                                                                                                        |
| Keywords:                       | nationwide study, HPV infection, anogenital, prevalence, Brazil                                                                                                                                                                                                                                                                                                                                                                                                                                                                                                                                                                                                                                                                                                                                                                                                                                                                                                                                                                                          |
|                                 |                                                                                                                                                                                                                                                                                                                                                                                                                                                                                                                                                                                                                                                                                                                                                                                                                                                                                                                                                                                                                                                          |

SCHOLARONE™  
Manuscripts

1  
2  
3 1 **POP-Brazil Study Protocol: A nationwide cross-sectional evaluation of the prevalence and**  
4  
5 2 **genotype distribution of human papillomavirus (HPV) in Brazil**  
6  
7  
8 3

9  
10 4 Eliana Marcia Wendland<sup>1,2</sup>, Juliana Caierão<sup>1</sup>, Carla Domingues<sup>3</sup>, Ana Goretti Kalume  
11  
12 5 Maranhão<sup>3</sup>, Flavia Moreno Alves de Souza<sup>4</sup>, Luciano Serpa Hammes<sup>1</sup>, Maicon Falavigna<sup>1,5</sup>,  
13  
14 6 Juliana Balbinot Hilgert<sup>6</sup>, Fernando Neves Hugo<sup>6</sup>, Marina Bessel<sup>1</sup>, Luisa Lina Villa<sup>7</sup>, Adele  
15  
16 7 Schwartz Benzaken<sup>3</sup>  
17  
18  
19 8

20  
21 9 <sup>1</sup>Hospital Moinhos de Vento. Porto Alegre, Brazil

22  
23 10 <sup>2</sup>Federal University of Health Science of Porto Alegre. Community Health Department. Porto  
24  
25 11 Alegre, Brazil

26  
27 12 <sup>3</sup>National Immunization Program, Brazilian Ministry of Health. Brasília, Brazil

28  
29 13 <sup>4</sup>Department of Surveillance, Prevention and Control of Sexually Transmitted Infections,  
30  
31 14 HIV/AIDS and Viral Hepatitis, Brazilian Ministry of Health. Brasilia, Brazil

32  
33 15 <sup>5</sup>National Institute for Health Technology Assessment, Federal University of Rio Grande do Sul,  
34  
35 16 Porto Alegre, Brazil

36  
37 17 <sup>6</sup>Department of Preventive and Social Odontology, Federal University of Rio Grande do Sul,  
38  
39 18 Porto Alegre, Brazil

40  
41 19 <sup>7</sup>Universidade de São Paulo and Instituto do Cancer do Estado de São Paulo (ICESP) São Paulo,  
42  
43 20 Brazil

44  
45 21  
46  
47 22 **Corresponding author**

48  
49 23 Eliana Marcia Wendland  
50  
51  
52  
53  
54  
55  
56  
57  
58  
59  
60

1  
2  
3 24 Rua Ramiro Barcelos 910. 90035-000. Porto Alegre, Brazil  
4

5 25 E-mail: eliana.wendland@hmv.org.br  
6

7  
8 26 Tel.: +55 51 3314 3600  
9

10 27  
11

12 28 **Word count:** 2,712  
13

14 29  
15  
16  
17  
18  
19  
20  
21  
22  
23  
24  
25  
26  
27  
28  
29  
30  
31  
32  
33  
34  
35  
36  
37  
38  
39  
40  
41  
42  
43  
44  
45  
46  
47  
48  
49  
50  
51  
52  
53  
54  
55  
56  
57  
58  
59  
60

For peer review only

1  
2  
3 30 **ABSTRACT**  
4

5 31 **Introduction:** Human papillomavirus (HPV) is associated with the development of genital warts  
6  
7 32 and different types of cancer, including virtually all cervical cancers and a considerable number  
8  
9 33 of penile, anal and oropharyngeal cancers. Data regarding the prevalence of HPV infection in  
10  
11 34 Brazil are limited and fragmented. We aim to determine HPV prevalence in sexually active  
12  
13 35 women and men from 16 to 25 years old and to investigate regional differences in virus  
14  
15 36 prevalence and types. **Methods and analysis:** This is a nationwide, multi-centric, cross-  
16  
17 37 sectional, prospective study that will include participants from 16 to 25 years old from all  
18  
19 38 Brazilian capital cities. Recruitment will occur in primary health units by trained health  
20  
21 39 professionals who will be responsible for collecting biological samples and interviewing the  
22  
23 40 volunteers. After signing informed consent, all participants will answer a questionnaire that will  
24  
25 41 collect sociodemographic and behavioral data. All samples will be processed in a certified  
26  
27 42 central laboratory, and strict quality control will be performed by many different procedures,  
28  
29 43 including double data entry, training and certification of primary care health professionals  
30  
31 44 responsible for data collection, simulation of interviews and auditing and monitoring of visits.  
32  
33 45 The sample size will be standardized based on the population distribution of each capital using  
34  
35 46 SAS<sup>®</sup> and R statistical software. **Ethics and dissemination:** The project was approved by the  
36  
37 47 Research Ethics Committee of the main institution and the corresponding ethics committees of  
38  
39 48 the recruitment sites. This will be the first Brazilian nationwide study to determine overall HPV  
40  
41 49 prevalence and to examine regional differences and social, demographic and behavioral factors  
42  
43 50 related to HPV infection. Critical analysis of the study results will contribute to epidemiological  
44  
45 51 knowledge and will set a baseline for future evaluation of the impact of the National HPV  
46  
47 52 Vaccination Program.  
48  
49  
50  
51  
52  
53  
54  
55  
56  
57  
58  
59  
60

1  
2  
3 53  
45 54 **Keywords:** HPV infection, prevalence, nationwide study, Brazil, anogenital  
6  
78 55  
910 56 **Strengths and limitations of this study**  
1112 57 • Representativeness of all regions of Brazil.  
1314 58 • Establishment of a baseline to evaluate the effectiveness of the HPV vaccination program  
15  
16  
17 59 in Brazil.  
1819 60 • Recruitment done in primary care units, inviting all people within the age range living in  
20  
21 61 the area and not over representing risk factor groups.  
2223 62 • Only the population that uses the primary care units from the public health system will be  
24  
25  
26 63 included, but that consists of 71% of the Brazilian population.  
2728 64  
29  
30  
31  
32  
33  
34  
35  
36  
37  
38  
39  
40  
41  
42  
43  
44  
45  
46  
47  
48  
49  
50  
51  
52  
53  
54  
55  
56  
57  
58  
59  
60

## 65 INTRODUCTION

66 According to the World Health Organization (WHO), more than 528,000 incident cases  
67 and approximately 270,000 deaths due to cervical cancer occur annually worldwide, 85% of  
68 which occur in low- and middle-income countries [1]. Virtually all these cancers are preceded by  
69 infection with high-risk oncogenic human papillomaviruses (HR-HPVs) [2], and HPV types 16  
70 and 18 are associated with 70% of these cases [3,4] In Brazil, the National Institute of Cancer  
71 estimated that there were 16,340 new cervical carcinoma cases in 2016, with a 33.23% mortality  
72 rate [5].

73 HR-HPVs are also responsible for 63% of penile cancers, 89% of anal cancers and 72%  
74 of oropharyngeal cancers in men [6,7]. Indeed, these viruses are now recognized as the major  
75 cause of the observed rising incidence rates of oropharyngeal squamous cell carcinoma; indeed,  
76 the primary risk factor for developing this cancer is oral HPV infection [8].

77 Most sexually active individuals will be infected by HPV at some point in their lives  
78 [9,10]. In Brazil, the prevalence of HPV infection in women with normal cervical cytology  
79 varies from 2.3% to 55.4% [11,12]. Considerable variability in HPV prevalence rates for other  
80 body sites, such as the penile epithelium and the oral cavity, are also observed in Brazil [11,12].

81 These data originated from studies that were heterogeneous with regard to methodology  
82 and/or the study population. In addition, virtually all studies to date were geographically  
83 restricted [13–17] and/or focused on specific groups of individuals, such as HIV-positive,  
84 pregnant and immunosuppressed patients [18–20]. Moreover, some of those studies recruited  
85 participants from clinics specializing in sexually transmitted infections, resulting in selection bias  
86 and inflation of the estimated prevalence [13–20].

1  
2  
3 87 Vaccination against HPV is being performed in many countries, and it is a method of  
4  
5 88 primary prevention of cancer and HPV infection [9]. Since 2014, the Brazilian Ministry of  
6  
7 89 Health has provided a quadrivalent (types 6, 11, 16 and 18) vaccine for women from 9-14 years  
8  
9 90 old, with a schedule of 0 and 6 months. In January 2017, Brazil was the first country in Latin  
10  
11 91 America to extend vaccination to men (11-14 years old) [21]. Baseline data of HPV prevalence  
12  
13 92 before vaccinations are vital in order to establish the impact of vaccination on the distribution of  
14  
15 93 HPV types.

16  
17  
18  
19 94 As far as we know, this is the first study presenting a nationwide scope with uniform  
20  
21 95 methodology to evaluate the Brazilian prevalence of HPV and its types, as well as to compare  
22  
23 96 the prevalence among specific geographical regions that present marked differences in social,  
24  
25 97 demographic, cultural and economic characteristics. In addition, the study will describe the  
26  
27 98 social, demographic, economic and behavioral factors associated with HPV positivity.  
28  
29  
30

31 99

## 32 33 100 **OBJECTIVES**

34  
35 101 The primary objective of the study is to determine the prevalence of HPV in women and  
36  
37 102 men aged 16-25 years in Brazil, evaluating the most prevalent types and possible differences  
38  
39 103 between regions and risk factors associated with positivity to establish a baseline for evaluation  
40  
41 104 of vaccine effectiveness.  
42  
43  
44

45 105

### 46 47 106 **Secondary objectives**

- 48  
49 107 • To determine the prevalence of HPV, high-risk types, genital warts and the  
50  
51 108 associated sexual behaviors;  
52  
53  
54  
55  
56  
57  
58  
59  
60

- 1  
2  
3 109 • To evaluate the co-infection of HPV-HIV in the young population that uses the  
4  
5 110 public health system;  
6  
7  
8 111 • To investigate beliefs and knowledge about HPV infection and vaccination in a  
9  
10 112 young population;  
11  
12 113 • To evaluate the association of other sexually transmitted infections (STIs),  
13  
14 114 such as syphilis, with the presence of HPV;  
15  
16  
17 115 • To evaluate the herd effect in a sample of unvaccinated men.  
18  
19  
20 116

## 21 22 117 **METHODS AND ANALYSIS**

### 23 24 118 25 26 119 **Design**

27  
28  
29 120 We will use a cross-sectional, nationwide, multi-centric design to establish a baseline  
30  
31 121 dataset that will enable prevalence comparison over time.  
32

### 33 122 34 35 123 **Recruitment and sample size**

36  
37  
38 124 Beginning in January 2017, sexually active women and men from 16 to 25 years old who  
39  
40 125 use the public health system in all 26 Brazilian capitals plus the Federal District of Brasilia  
41  
42 126 across the five geographical regions will be recruited through public primary care units

43  
44  
45 127 Because endocervical collection is not recommended during pregnancy in Brazil and/or  
46  
47 128 to avoid selection bias, the following exclusion criteria will be applied: pregnant women, those  
48  
49 129 who delivered a baby in the last 3 months, those who have undergone a hysterectomy or  
50  
51 130 trachelectomy and those who have ever had cervical intraepithelial neoplasia grade 2 or higher  
52  
53  
54 131 will be considered ineligible for the study.  
55  
56  
57  
58  
59  
60



1  
2  
3 132           There will be no exclusion based on HPV vaccination status, but we will investigate  
4  
5 133 whether the participants have been vaccinated. Since the vaccination program was launched in  
6  
7 134 2014 for women who were 9-13 years old and our study population is among 16-25-year-olds,  
8  
9  
10 135 we believe that most of the volunteers will be not have been vaccinated.

11  
12 136           The primary care units in each city were selected based on their representativeness of the  
13  
14 137 health districts and based on their resources to collect and store oral samples. Most of these units  
15  
16 138 have a defined territory and a list of all people within the age range. When the list is available, all  
17  
18 139 participants will be invited. When the list is not available, participants will be recruited by  
19  
20 140 different approaches: (i) eligible individuals who came to the unit for any reason not associated  
21  
22 141 with the main study's outcome; (ii) personal invitation by the community health agents; and (iii)  
23  
24 142 invitation by nurses in the school-based health promotion program. The study sample size (7,935  
25  
26 143 individuals) was calculated to detect differences of 5% in HPV prevalence between regions with  
27  
28 144 a power of 80% and an alpha error of 5% for women using an estimate of 30% [22] for the  
29  
30 145 prevalence of HPV in Brazil. This sample size will allow an estimate with an error between 1.6%  
31  
32 146 and 5.7%, according to sex.

33  
34  
35 147           The sample size will be purposely equal in all regions (1,587 individuals) to maximize  
36  
37 148 the diversity in less populated areas and will be standardized by the Brazilian population of each  
38  
39 149 region during analyses.

40  
41  
42 150

## 43 44 45 151 **Measurements**

46  
47  
48 152

49  
50  
51 153 Sociodemographic variables  
52  
53  
54  
55  
56  
57  
58  
59  
60

1  
2  
3 154 Participants will be asked to answer questions regarding age, gender, race/skin color,  
4  
5 155 household characteristics, relationship status, educational level, occupational status, last-month  
6  
7 156 family income and the number of people dependent on this income.  
8  
9

10 157  
11  
12 158 Smoking, alcohol and other drugs  
13  
14 159 Questions concerning current and past smoking habits, including quantity and frequency,  
15  
16 160 will be asked of the participants. Moreover, the interview includes questions about the use of  
17  
18 161 alcohol and other drugs such as marijuana, cocaine, ecstasy, crack, and the abuse of morphine or  
19  
20 162 other licit and illicit drugs.  
21  
22  
23

24 163  
25  
26 164 Sexual and reproductive health  
27

28 165 Participants will be asked to supply details about their age at first sexual intercourse, their  
29  
30 166 involvement in same sex relationships, their use of condoms, the number of sexual partners, their  
31  
32 167 sexual practices and the presence of any genital symptoms during or after sexual intercourse such  
33  
34 168 as pain or bleeding.  
35  
36

37 169 Their age of menarche, the number of pregnancies and deliveries, the number of  
38  
39 170 abortions, their use of contraceptive methods and the occurrence of sexually transmitted  
40  
41 171 infections will be asked of participants to evaluate their sexual health. All suspicious HPV-  
42  
43 172 related lesions will be photographed for future evaluation.  
44  
45

46 173  
47  
48 174 Knowledge about HPV, vaccination and screening tests  
49

50 175 We will measure how much participants know about HPV and vaccination (when and  
51  
52 176 who must receive the vaccine). The questionnaire is based on Saulle et al [23]. Moreover,  
53  
54  
55  
56  
57  
58  
59

1  
2  
3 177 participants will be asked if they know about Pap smears, if they have already received the exam  
4  
5 178 and if so, if any alteration was ever observed.  
6  
7

8 179

9  
10 180 HPV frequency and type

11  
12 181 We will measure the proportion of the sample that is infected by HPV, and we will look  
13  
14 182 at the prevalence of high-risk types and the most prevalent types in the genital and oropharyngeal  
15  
16 183 sites. Additionally, we will investigate the presence of chronic lesions (lasting 15 days or more)  
17  
18 184 in the oral cavity that are related to the presence of HPV.  
19  
20

21 185

## 22 186 **Outcomes**

23  
24  
25  
26 187 The nationwide prevalence of HPV in the genitals is the major outcome. Secondary  
27  
28 188 outcomes include the prevalence of specific HPV types, the comparison of prevalence between  
29  
30 189 Brazilian regions, and the prevalence of HR-HPVs and LR-HPVs.  
31  
32

33 190

## 34 191 **Procedures**

35  
36  
37 192 All individuals will respond to a standardized interview based on validated instruments  
38  
39 193 [23–26]. After the interview, samples from the oral cavity and cervical or penile/scrotal sites will  
40  
41 194 be collected from each participant.  
42  
43

44 195 An online platform for data entry will be used by primary care professionals to add  
45  
46 196 participant data, biological sample information and photographs. The same platform will be used  
47  
48 197 for study process control and to allow availability of the results to primary care health  
49  
50 198 professionals. Participants will have access to an external webpage where they will be able find  
51  
52 199 information about their results, as protected by a password provided during interview. In cases in  
53  
54  
55  
56  
57  
58  
59  
60

1  
2  
3 200 which high-risk HPV infection is detected, those participants will be asked to return to the  
4  
5 201 primary care unit to be informed about the result.  
6

7  
8 202 Oral samples will be obtained through mouthwash and gargle cycles by using 10 ml of a  
9  
10 203 standardized commercial mouthwash. The samples will be obtained in 3 cycles of 5 seconds each  
11  
12 204 and will be stored in a 15-ml Falcon tube identified with a five digit number bar code and the  
13  
14 205 date of collection.  
15

16  
17 206 Cervical samples will be obtained using the Digene<sup>®</sup> HC2 DNA Collection kit (Qiagen)  
18  
19 207 and placed in 1 ml of Specimen Transport Medium (STM), according to the manufacturer's  
20  
21 208 instructions.  
22

23  
24 209 Penile (penile shaft, glans penis/coronal sulcus) and scrotum samples will be obtained  
25  
26 210 using a Dacron swab (Qiagen) previously moistened in sterile saline solution. Collection will be  
27  
28 211 performed by intensely pressing and rubbing the swab in the epithelium via self-collection under  
29  
30 212 supervision of the primary care health professional and after instruction regarding the procedure.  
31  
32

33 213 All biological samples will be maintained at room temperature (15°C to 25°C) according to  
34  
35 214 manufacturer's instructions and transported to a central lab in Porto Alegre to start the specimen  
36  
37 215 processing. The temperature will be monitored with a data logger. Figure 1 presents the general  
38  
39 216 logistics for the nationwide multicenter collection of data and specimens.  
40  
41

42 217 Individuals who present visible lesions on the genitals or in the oral cavity at the time of  
43  
44 218 recruitment will be asked to grant permission for a picture to be taken of the lesion.  
45  
46

47 219

#### 48 49 220 Specimen processing 50

51 221 All samples will be treated as biohazardous material, and all specimen handling will be  
52  
53 222 performed in a biosafety cabinet. In the laboratory, specimens will be immediately aliquoted.  
54  
55  
56  
57  
58  
59  
60

1  
2  
3 223 One aliquot will be maintained at  $-80^{\circ}\text{C}$  as a backup. Another aliquot will be processed for DNA  
4  
5 224 extraction from the STM medium using magnetic beads for isolation and purification using the  
6  
7  
8 225 automatized extraction platform (MagNA Pure LC 2.0, Roche Molecular Systems)), after  
9  
10 226 exposed to an enzymatic treatment with proteinase K, following the manufacturer's instruction.

11  
12 227 HPV detection and typing will be done using the Linear Array<sup>®</sup> HPV Genotyping Test  
13  
14 228 (Roche Diagnostics), which is based on PCR amplification (450-bp fragment of the polymorphic  
15  
16  
17 229 region of the L1 gene of HPV), followed by specific hybridization and colorimetric detection,  
18  
19 230 according to the manufacturer's instructions. The test detects HR-HPVs (16, 18, 31, 33, 35, 39,  
20  
21 231 45, 51, 52, 56, 58, 59 and 68) and LR-HPVs (6, 11, 26, 40, 42, 53, 54, 55, 61, 62, 64, 66, 67, 69,  
22  
23  
24 232 70, 71 72, 73, 81, 82, 83, 84, IS39 and CP6198), for a total of 37 types. The amplification of  
25  
26 233 human  $\beta$ -globin (biotinylated primers GH20 and PC04, 268-bp fragment) is used as an internal  
27  
28 234 control for the PCR. To ensure reproducibility of LA, an automated AutoBlot instrument  
29  
30  
31 235 (Fujirebio) was used for hybridization and wash steps. Real-time PCR using the TaqMan system  
32  
33 236 for HPV type 52 will be performed to confirm the results obtained by Roche's test as a  
34  
35 237 combination of HPV types 52, 33, 35 and 58.

### 36 37 38 39 40 239 **Data analyses and statistics**

41  
42 240 Categorical variables will be summarized using absolute frequencies and percentage,  
43  
44 241 while continuous variables will be analyzed using means and standard error. Chi-squared tests  
45  
46  
47 242 and Fisher's exact tests will be used to compare proportions, and t-tests or Mann-Whitney non-  
48  
49 243 parametric tests will be used for continuous variables.

1  
2  
3 244 The association between HPV infection and social and behavioral variables will be  
4  
5 245 defined by calculating crude and adjusted prevalence ratios. Confounding variables will be  
6  
7  
8 246 evaluated using modified Poisson regression analysis [27].  
9

10 247 To maximize diversity across regions, we have divided the sample size into equal  
11  
12 248 numbers among regions. To adjust the distribution of the sample to the study population, we will  
13  
14 249 standardize the measures by the size of the population in each capital within the age range and by  
15  
16  
17 250 sex.  
18

19 251

### 21 252 **Monitoring and quality control**

22  
23  
24 253 The data quality will be validated by routine practices. A pilot study was performed to  
25  
26 254 identify and correct problems in data collection, sample transportation, procedures and  
27  
28 255 instruments. All health professionals involved in the research are trained and certified by the  
29  
30  
31 256 coordinator team using simulated interview and sample collection according to the study  
32  
33 257 protocol, as described in the POP-Brazil operations manuals.  
34

35 258 Data and specimen collection are periodically evaluated by reports generated by the data  
36  
37 259 system, including information about the number of participants and the number of refusals, and  
38  
39 260 the quality of the samples collected. Those reports will be distributed monthly to all people  
40  
41  
42 261 involved in data collection.  
43

44 262 Moreover, each unit will receive at least one *in loco* monitoring visit, which will be done  
45  
46 263 by research staff supervisors to evaluate protocol compliance and provide recertification.  
47  
48 264 Supervisors will observe techniques utilizing predefined check lists and recorded interviews.  
49  
50

51 265 The biological sample tracking is done through the web-based data platform, and time,  
52  
53  
54 266 temperature and sample conditions are evaluated on a daily basis.  
55  
56  
57  
58  
59  
60

1  
2  
3 267 To access the reliability of the interviews, a subsample will be obtained in duplicate. A  
4  
5 268 resampling will be done in 10% of the interviews using phone calls to access the coefficient of  
6  
7 269 variation and systematic differences between data. Figure 2 presents the steps that will be taken  
8  
9 270 for quality assurance. The reliability of HPV detection will be accessed by double processing a  
10  
11 271 random subsample of the biological genital samples by the Centers for Disease Control and  
12  
13 272 Prevention.  
14  
15  
16  
17 273

### 19 274 **Patient and Public Involvement**

21 275 Patients and public were not involved in the study design and/or protocol. In  
22  
23 276 cases of no infection or infection with a low-risk HPV type, participants will be informed of  
24  
25 277 negative results via web access. Conversely, participants infected with high-risk HPV types will  
26  
27 278 be advised to go to the health care unit for their results, where they will be oriented about the  
28  
29 279 meaning of the result and instructed about follow-up according to national guidelines.  
30  
31  
32

33 280 Participants will be informed about the study results through study web site.  
34  
35  
36 281  
37  
38 282

### 40 283 **DISCUSSION**

41  
42 284 This is the first Brazilian nationwide study to determine HPV prevalence and the social,  
43  
44 285 demographic and behavioral factors related to HPV infection. Critical analysis of the study  
45  
46 286 results will contribute to epidemiological knowledge of the distribution of HPV strains across  
47  
48 287 geographical regions and will establish a baseline to evaluate the impact of the Brazilian  
49  
50 288 Vaccination Program.  
51  
52  
53  
54  
55  
56  
57  
58  
59  
60

1  
2  
3 289           There are some limitations of this study. The sampling is not random. Brazil is a large  
4  
5 290 country, and due to logistic reasons, the sampling is restricted to state capitals in public health  
6  
7 291 units selected by the local government. To minimize selection bias, in addition to recruiting  
8  
9 292 participants that voluntarily come to the health unit, we will also recruit at schools, through the  
10  
11 293 list of patients of the selected health units, and by personal invitation by community health  
12  
13 294 agents in households. We are also only recruiting participants in the public health system, whom  
14  
15 295 account for approximately 70% of the overall Brazilian population; therefore, we cannot draw  
16  
17 296 inferences about people who exclusively use the private sector. In Brazil, the private sector is  
18  
19 297 mainly used by social classes A and B, but it is important to highlight that for some services such  
20  
21 298 as vaccination, the Public Health System covers virtually 100% of the population.  
22  
23  
24  
25

26 299           The strengths of the study are the establishment of a baseline for future comparison of  
27  
28 300 HPV prevalence, the nationwide sampling, including a large and diverse population and the use  
29  
30 301 of central laboratory and techniques for data quality monitoring. Additionally, we will collect  
31  
32 302 data on sexual behaviors and other STIs, making it possible to pursue some explanation  
33  
34 303 regarding differences in prevalence according to specific groups of participants.  
35  
36  
37

38 304           Health managers, based on these data, will be able to compare HPV prevalence in  
39  
40 305 different regions according to population characteristics; it will be possible to support the  
41  
42 306 development of strategies to promote HPV vaccination and to develop strategies for prevention,  
43  
44 307 taking into account regional differences. Moreover, these data will serve as a baseline for future  
45  
46 308 comparisons and will allow monitoring of the effectiveness of the National HPV Vaccination  
47  
48 309 Program.  
49  
50

51 310

## 52 53 311 **ETHICS AND DISSEMINATION**



1  
2  
3 312 Before starting the study, this project was submitted to the Research Ethical Committee  
4  
5 313 of the proposing institution (Hospital Moinhos de Vento). Following approval, agreements were  
6  
7 314 made by all co-participant centers and submitted to their corresponding ethical committees.  
8  
9

10 315 Individuals must voluntarily agree to participate and must sign the free and informed  
11  
12 316 consent form. The study follows the ethical recommendations of Resolutions 347/05, 441/11 and  
13  
14 317 466/12 of the National Health Council.  
15  
16

17 318 Preliminary results will be presented as poster and/or oral sections in national and  
18  
19 319 international congresses, and the final results will be submitted for publishing in peer-reviewed  
20  
21 320 open-access journals. The results will also be presented in a personal meeting to the Ministry of  
22  
23 321 Health of Brazil.  
24  
25

26 322

27  
28 323  
29  
30  
31  
32  
33  
34  
35  
36  
37  
38  
39  
40  
41  
42  
43  
44  
45  
46  
47  
48  
49  
50  
51  
52  
53  
54  
55  
56  
57  
58  
59  
60

324 **REFERENCES**

- 325 1 Globocan. Home. 2012. <http://globocan.iarc.fr/Default.aspx> (accessed 1 Dec 2017).
- 326 2 Walboomers JM, Jacobs MV, Manos MM, et al. Human papillomavirus is a necessary  
327 cause of invasive cervical cancer worldwide. *J Pathol* 1999;189:12–9.  
328 doi:10.1002/(SICI)1096-9896(199909)189:1<12::AID-PATH431>3.0.CO;2-F
- 329 3 Bosch FX, Lorincz A, Muñoz N, et al. The causal relation between human  
330 papillomavirus and cervical cancer. *J Clin Pathol* 2002;55:244–65.
- 331 4 Guan P, Howell-Jones R, Li N, et al. Human papillomavirus types in 115,789 HPV-  
332 positive women: A meta-analysis from cervical infection to cancer. *Int J Cancer*  
333 2012;131:2349–59. doi:10.1002/ijc.27485
- 334 5 Portal - Instituto Nacional de Câncer - INCA.  
335 <http://www2.inca.gov.br/wps/wcm/connect/inca/portal/home> (accessed 1 Dec 2017).
- 336 6 Serrano B, Brotons M, Bosch FX, et al. Epidemiology and burden of HPV-related  
337 disease. *Best Pract Res Clin Obstet Gynaecol* 2018;47:14-26.  
338 doi:10.1016/j.bpobgyn.2017.08.006
- 339 7 Han JJ, Tarney CM, Song J. Variation in genital human papillomavirus infection  
340 prevalence and vaccination coverage among men and women in the USA. *Future Oncol*  
341 *Lond Engl* 2017;13:1129–32. doi:10.2217/fon-2017-0147
- 342 8 Taberna M, Mena M, Pavón MA, et al. Human papillomavirus-related oropharyngeal  
343 cancer. *Ann Oncol* 2017;28:2386–98. doi:10.1093/annonc/mdx304
- 344 9 HPV | Home | Human Papillomavirus | CDC. <https://www.cdc.gov/hpv/index.html>  
345 (accessed 1 Dec 2017).

- 1  
2  
3 346 10 Syrjänen K, Hakama M, Saarikoski S, et al. Prevalence, incidence, and estimated life-  
4  
5 347 time risk of cervical human papillomavirus infections in a nonselected Finnish female  
6  
7 348 population. *Sex Transm Dis* 1990;17:15–9.
- 9  
10 349 11 HPV INFORMATION CENTRE. <http://www.hpvcentre.net/> (accessed 1 Dec 2017).
- 11  
12 350 12 Colpani V, Bidinotto AB, Falavigna M et al. Prevalence of papillomavirus in Brazil: a  
13  
14 351 systematic review protocol. *BMJ Open* 2016;6: e011884.
- 15  
16  
17 352 13 Coser J, da Rocha Boeira T, Wolf JM, et al. Cervical human papillomavirus infection and  
18  
19 353 persistence: a clinic-based study in the countryside from South Brazil. *Braz J Infect Dis*  
20  
21 354 2016;20:61–8. doi:10.1016/j.bjid.2015.10.008
- 22  
23  
24 355 14 de Oliveira GR, Vieira VC, Barral MFM, et al. [Risk factors and prevalence of HPV  
25  
26 356 infection in patients from basic health units of an university hospital in Southern Brazil].  
27  
28 357 *Rev Bras Ginecol Obstet* 2013;35:226–32.
- 29  
30  
31 358 15 Corrêa CM, Teixeira Teixeira NC, Araujo AC, et al. Prevalence and multiplicity of HPV  
32  
33 359 in HIV women in Minas Gerais, Brazil. *Rev Assoc Med Bras* 2011;57:425–30.
- 34  
35  
36 360 16 da Silva MC, Martins HPR, de Souza JL, et al. Prevalence of HPV infection and  
37  
38 361 genotypes in women with normal cervical cytology in the state of Paraná, Brazil. *Arch*  
39  
40 362 *Gynecol Obstet* 2012;286:1015–22. doi:10.1007/s00404-012-2399-y
- 41  
42  
43 363 17 Girianelli VR, Thuler LCS, e Silva GA. [Prevalence of HPV infection among women  
44  
45 364 covered by the family health program in the Baixada Fluminense, Rio de Janeiro, Brazil].  
46  
47 365 *Rev Bras Ginecol Obstet* 2010;32:39–46.
- 48  
49 366 18 Meyrelles ARI, Siqueira JD, Hofer CB, et al. HIV/HPV co-infection during pregnancy in  
50  
51 367 southeastern Brazil: prevalence, HPV types, cytological abnormalities and risk factors.  
52  
53 368 *Gynecol Oncol* 2013;128:107–12. doi:10.1016/j.ygyno.2012.10.003

- 1  
2  
3 369 19 Silva LM, Santos WGD, Santiago MB. Prevalence of cutaneous warts in patients with  
4  
5 370 systemic lupus erythematosus: a systematic review. *J Infect Dev Ctries* 2016;10:902–6.  
6  
7  
8 371 20 Vieira RC, Monteiro JSV, Manso EP, et al. Prevalence of type-specific HPV among  
9  
10 372 female university students from northern Brazil. *Infect Agent Cancer* 2015;10:21.  
11  
12 373 doi:10.1186/s13027-015-0017-x  
13  
14 374 21 HPV | UNA-SUS. <https://www.unasus.gov.br/tags/hpv> (accessed 1 Dec 2017).  
15  
16 375 22 Ayres ARG, Silva GA. Cervical HPV infection in Brazil: systematic review. *Rev Saúde*  
17  
18 376 *Pública* 2010;44:963–74. doi:10.1590/S0034-89102010000500023  
19  
20  
21 377 23 Saulle R, Miccoli S, Unim B, et al. Validation of a questionnaire for young women to  
22  
23 378 assess knowledge, attitudes and behaviors towards cervical screening and vaccination  
24  
25 379 against HPV in Italy. *Epidemiol Biostat Public Health* 2014;11. doi:10.2427/8913  
26  
27  
28 380 24 Critério Brasil - ABEP. <http://www.abep.org/criterio-brasil> (accessed 1 Dec 2017).  
29  
30  
31 381 25 Soares AHR. O aprendizado da sexualidade: reprodução e trajetórias sociais de jovens  
32  
33 382 brasileiros. *Cad Saúde Pública* 2007;23:1495–6. doi:10.1590/S0102-  
34  
35 383 311X2007000600025  
36  
37  
38 384 26 Comportamento sexual da população brasileira e percepções do HIV/Aids | Biblioteca  
39  
40 385 Virtual em Saúde. <http://pesquisa.bvsalud.org/bvsms/resource/pt/mis-3389> (accessed 1  
41  
42 386 Dec 2017).  
43  
44  
45 387 27 Barros AJD, Hirakata VN. Alternatives for logistic regression in cross-sectional studies:  
46  
47 388 an empirical comparison of models that directly estimate the prevalence ratio. *BMC Med*  
48  
49 389 *Res Methodol* 2003;3:21. doi:10.1186/1471-2288-3-21  
50

390

1  
2  
3 391 **AUTHOR CONTRIBUTIONS**  
4

5 392 EMW conceived of the project and participated in all phases of the manuscript preparation; ASB,  
6  
7 393 AGM, LSH, MFAS, JH, FHN, FM, LLV, CMD and MB participated in the protocol  
8  
9  
10 394 development; and JC and LLV participated in the laboratory protocol development and helped  
11  
12 395 write the manuscript. All authors reviewed the final version of the manuscript.  
13  
14

15 396

16  
17 397 **FUNDING**  
18

19 398 This work is financed by Hospital Moinhos de Vento through the Program for Supporting the  
20  
21 399 Institutional Development of the Public Health System (PROADI-SUS), supported by the  
22  
23 400 Ministry of Health of Brazil, with funding participation of the Pan-American Health  
24  
25 401 Organization.  
26  
27

28 402  
29

30  
31 403 **COMPETING INTERESTS**  
32

33 404 ASB, FMAS, CMD and AGM work for the Ministry of Health of Brazil. The other authors  
34  
35 405 declare no conflict of interest. LLV is a consultant for Merck for the HPV quadrivalent vaccine  
36  
37 406 and for Qiagen, BD and Roche for HPV DNA tests.  
38  
39

40 407

41  
42 408 **ACKNOWLEDGMENTS**  
43

44 409 We would like to thank Julian Peto and Claire Gilham from the London School of Hygiene and  
45  
46 410 Tropical Medicine for helping with the development of sampling procedures and Elisabeth  
47  
48 411 Unger and Lauri Markowitz from the Centers for Disease Control and Prevention for providing  
49  
50 412 helpful suggestions in developing the study protocol and quality control.  
51  
52

53 413  
54  
55  
56  
57  
58  
59  
60

1  
2  
3 414 **FIGURE LEGENDS**  
4

5 415 **Figure 1.** Workflow of the study. 1. Data are collected in public health units from all 27  
6  
7 416 Brazilian capitals; 2. Data entry into the web-based system is performed by primary care  
8  
9 417 professionals and is monitored by the main research team in Porto Alegre (Hospital Moinhos de  
10  
11 418 Vento); 3. Paper forms are sent to Porto Alegre along with biological samples, which are  
12  
13 419 processed for DNA extraction (UFCSPA); and 4. Extracted DNA is sent to São Paulo (USP) for  
14  
15 420 HPV detection and typing. Finally, the results are included in the web-based system and are  
16  
17 421 made available for the primary care professionals and participants using a code number and  
18  
19 422 password.  
20  
21  
22  
23

24 423 **Figure 2.** Description of the study's major quality control steps during each phase of the study.  
25  
26  
27  
28  
29  
30  
31  
32  
33  
34  
35  
36  
37  
38  
39  
40  
41  
42  
43  
44  
45  
46  
47  
48  
49  
50  
51  
52  
53  
54  
55  
56  
57  
58  
59  
60



Workflow of the study. 1. Data are collected in Public Health Units from all 27 Brazilian capitals; 2. Data entry on the web-based system are performed by primary care professionals and are monitored by main research team in Porto Alegre (Hospital Moinhos de Vento); 3. Paper forms are sent to Porto Alegre along with biological samples, which are processed for DNA extraction (UFCSPA); 4. Extracted DNA are sent to São Paulo (USP) for HPV detection and typing. Finally, results are included on the web-based system and became available for primary care professionals and participants.

106x143mm (300 x 300 DPI)

1  
2  
3  
4  
5  
6  
7  
8  
9  
10  
11  
12  
13  
14  
15  
16  
17  
18  
19  
20  
21  
22  
23  
24  
25  
26  
27  
28  
29  
30  
31  
32  
33  
34  
35  
36  
37  
38  
39  
40  
41  
42  
43  
44  
45  
46  
47  
48  
49  
50  
51  
52  
53  
54  
55  
56  
57  
58  
59  
60



Description of the study's major quality control steps during each phase of the study.

150x99mm (300 x 300 DPI)

view only
